1 **Exposure to stressors and antimicrobials induces cell-autonomous**  
2 **ultrastructural heterogeneity of an intracellular bacterial pathogen**

3

4 Marc Schulte, Michael Hensel, and Katarzyna Miskiewicz

5 Abt. Mikrobiologie, Universität Osnabrück, Osnabrück, Germany, CellNanOs – Center of

6 Cellular Nanoanalytics Osnabrück

7

8 Running title: Intracellular *Salmonella* ultrastructural heterogeneity

9 Keywords: intracellular pathogen, bacterial heterogeneity, stress response, bacterial

10 cytoplasm, CLEM

11

12 *Address for correspondence:*

13 Michael Hensel

14 Abteilung Mikrobiologie

15 Fachbereich Biologie/Chemie, Universität Osnabrück

16 Barbarastr. 11

17 49076 Osnabrück, Germany

18 Tel: ++ 49 (0)541 969 3940

19 Fax: ++ 49 (0)541 969 3942

20 E-mail: [Michael.Hensel@uni-osnabrueck.de](mailto:Michael.Hensel@uni-osnabrueck.de)

21

12.09.2020

## Intracellular *Salmonella* ultrastructural heterogeneity

### 22 **Abstract**

23 Despite being clonal, bacterial pathogens show a remarkable physiological heterogeneity  
24 during infection of host and within host cells. This diversity is reflected by distinct  
25 ultrastructural morphotypes in transmission electron microscopy (TEM). Gram-negative  
26 bacteria visualized at high resolution by TEM show a rather simple composition of cytoplasm  
27 with a centrally located nucleoid and large number of ribosomes. The cytoplasm is separated  
28 from the external environment by inner and outer membranes. In this study, we show that  
29 individual cells of *Salmonella enterica* serovar Typhimurium (STM) are ultrastructural  
30 divergent in standard culture conditions, as well as during their intracellular lifestyle in  
31 mammalian host cells. STM can basically be discriminated into two morphotypes based on  
32 the criterion of cytoplasmic density. We identified environmental conditions which affect  
33 cytoplasmic densities. Using chemical treatments and defined mutant strains, we were able to  
34 link the occurrence of an electron-dense type to oxidative stress and other noxes.  
35 Furthermore, ultrastructural analyses of STM during infection and fluorescence reporter  
36 analyses for cell viability were combined in a correlative light and electron microscopy  
37 approach. We provide evidence that two newly characterized ultrastructural types with lucent  
38 or dense cytoplasm represent viable cells. Moreover, the presence of electron-dense types is  
39 stress related and can be experimentally induced only when amino acids are available in the  
40 environment. This study sheds more light on diversities between individual bacteria in  
41 populations and possible physiological meanings like a stress response to explain the  
42 diversities discussed.

### 43 **Importance**

44 Bacterial pathogens show a remarkable resilience to adverse conditions during infection.  
45 Although being genetically identical, a clonal population may contain dead, dormant, slowly

12.09.2020

## Intracellular *Salmonella* ultrastructural heterogeneity

46 as well as rapidly proliferating cells. The physiological state of individual cells in a  
47 population may be analyzed by fluorescent probes or reporters. In contrast, reliable markers to  
48 interrogate single cells regarding viability, response to environmental cues, and exposure to  
49 antimicrobial compounds are sparse for ultrastructural approaches. For intracellular  
50 *Salmonella enterica* we observed distinct ultrastructural morphotypes. Using defined  
51 experimental conditions, these morphotypes were linked to reactions of bacteria to stressors  
52 or antimicrobials. The parameters defined here provide criteria for the interpretation of  
53 bacterial heterogeneity on the ultrastructural level.

54

12.09.2020

Intracellular *Salmonella* ultrastructural heterogeneity

## 55 **Introduction**

56 Recent research on pathogenic bacteria revealed that cells react individually when exposed to  
57 adverse conditions due to differences in their physiological status (1-7). Classification of  
58 diversities and understanding of their biological function are crucial for designing new  
59 antimicrobials, which would overcome bacterial resistance without the risk of imposing  
60 selective pressure towards bacterial survival. Despite great progress in understanding the role  
61 of individual virulence factors for bacterial pathogenesis, the resilient bacterial survival in  
62 detrimental environmental conditions is still enigmatic (8-10). In the context of stress  
63 response to environmental cues, the formation of a dormant state with metabolic shifts, and  
64 change in cytoplasmic dynamics was postulated (11, 12). In general, bacterial cells appear  
65 structurally more complex than previously considered. For instance, the bacterial cytoplasm  
66 displays, in addition to high molecular crowding, unusual motility dynamics for differently-  
67 sized particles, properties of glass-phase, or transitions to solid-states (13, 14).

68 Transmission EM (TEM) is very potent to visualize the composition of bacterial envelopes,  
69 protein complexes, and has shed light on protein shell structures, revolutionizing the view on  
70 bacterial organelles (15, 16). Conventional TEM is broadly used as standard method to  
71 evaluate effects of bactericidal compounds (6, 17-21). In contrast, TEM was rarely applied to  
72 describe diversities of pathogenic bacteria at the single-cell level.

73 Bacterial cells visualized by EM demonstrate high ultrastructural variability, but the causes of  
74 this diversity are unknown (22-34). Distinct reactions to environmental stress can be a reason  
75 for such heterogeneity, as shown for aquatic microorganisms (35). However, direct links  
76 between physiological state, stress factors, and the bacterial ultrastructure have not been  
77 demonstrated. Identification of such links could delineate indicators of changes or  
78 circumstances critical for bacterial survival, to predict formation of persisters, to estimate  
79 sensitivities of populations, or to develop preventive strategies against bacterial infections.

12.09.2020

## Intracellular *Salmonella* ultrastructural heterogeneity

80 Hence, the investigation of different ultrastructural types and their frequencies may allow to  
81 predict prevailing environmental conditions, especially in the background of analyses of  
82 intracellular pathogens, or analyses of bacterial populations *in vivo* or free-living isolates.

83 The capability of *Salmonella enterica* serovar Typhimurium (STM) to survive harsh  
84 conditions in environments within and outside of mammalian hosts makes it a good model  
85 organism to reveal the basis of bacterial heterogeneity. STM is a foodborne pathogen, capable  
86 to pass the low pH barrier of the stomach. STM is exposed to host defense mechanisms and  
87 competing microbes in the host gastrointestinal tract. STM can invade epithelial cells, survive  
88 and proliferate in host cells, and can abuse phagocytes for spreading and replication within  
89 phagosomes. Within host cells, STM is enclosed by a specific vacuole (*Salmonella*-containing  
90 vacuole, SCV) and drives the formation of tubular membrane network (*Salmonella*-induced  
91 filaments, SIF), supporting its intracellular survival and progression (36-38). Moreover, STM  
92 is capable to survive and replicate within the host cell cytoplasm after escaping the SCV (39).  
93 Intracellular survival requires fast stress response and cellular reprogramming for protection  
94 and repair when facing strong bactericidal host defenses such as reactive oxygen species  
95 (ROS) (40-43).

96 In this study, we shed light on the consequences of environmental changes and exposure to  
97 stress factors for the bacterial ultrastructure. We demonstrate that heterogeneity, at the single-  
98 cell level, and ultrastructural homogeneity depend on the environment and can be  
99 experimentally induced. The approach presented here enables to link ultrastructural diversity  
100 with the physiological status of individual bacteria and environmental cues. For that, we  
101 combined classical microbiological assays with qualitative and quantitative TEM to study  
102 effects of induced oxidative stress and bactericidal conditions in STM wild type (WT) and the  
103 *sodAB* strain hypersensitive to ROS. Furthermore, we developed a strategy for fast correlative  
104 light and electron microscopy (CLEM) using high-voltage TEM of thick serial sections, and a  
105 fluorescent reporter for measuring bacterial metabolic activity. These results validate that

12.09.2020

## Intracellular *Salmonella* ultrastructural heterogeneity

106 different ultrastructural types are viable bacteria. The combination of ultrastructural studies at  
107 the single-cell level with fluorescent reporters is the next step towards an understanding of  
108 bacteria as individual organisms and their lifestyles.

109

12.09.2020

Intracellular *Salmonella* ultrastructural heterogeneity

## 110 **Results**

111 Bacterial cells rapidly respond to changing environments in order to adapt and to survive. We  
112 asked if different physiological states of bacteria are reflected by ultrastructural features. We  
113 reasoned that the bacterial response to different environments and to stressor or antimicrobial  
114 agents, may result in cells differing in their nanostructure.

### 115 *Ultrastructural diversity of Salmonella enterica cells in culture*

116 First, we applied conventional TEM with and without post-contrasting with heavy metals.  
117 STM WT was grown in Phosphate-Carbon-Nitrogen (PCN, (44)) minimal medium at pH 7.4  
118 for 3.5 h for culture at reduced growth rate of 0.98, compared to 1.33 in rich medium LB (  
119 (41, 45)). TEM analysis revealed that bacteria were very similar in ultrastructure, with a  
120 clearly visible outer and inner membrane separated by the periplasmic space (Figure 1A). The  
121 distance between the outer and inner membranes was  $20 \pm 5$  nm (mean  $\pm$  SD). The center of  
122 cells, outlined by the inner membrane, was slightly electron dense with a difference of  $135 \pm$   
123  $16$  in mean gray values (MGV) to the background, referred further as electron density. That  
124 region contained cytoplasm with protein complexes like ribosomes, visible as denser  
125 particles, which were distributed homogenously within the cell. Electron lucent and ribosome-  
126 free regions consisted of up to 16% of total cytoplasmic area and occupied not larger than 28  
127  $\text{nm}^2$  of area of clearly visible nucleoids. Hence, bacteria grown in the minimal PCN medium  
128 at physiological pH formed uniform populations of similar ultrastructure.

129 In addition, we analyzed the ultrastructure of STM cells cultured in PCN pH 7.4 medium  
130 supplemented with an amino acid (AA) mix (44) to increase the bacterial growth rate (Figure  
131 1B). STM grown in PCN medium containing AA resembled bacteria grown in PCN medium  
132 without AA supplementation and formed a uniform bacterial population (Figure 1).

133 This was in contrast to bacteria grown in lysogeny broth (LB) as standard rich medium. If  
134 bacteria grown overnight in PCN medium were subcultured for 3.5 h in LB medium, cells

12.09.2020

## Intracellular *Salmonella* ultrastructural heterogeneity

135 with highly electron-dense cytoplasm were found, referred to as ‘electron-dense’ (ED) cells  
136 (arrowhead in Figure 1C), in addition to cells similar to these grown in PCN medium, referred  
137 to as ‘electron-lucent’ (EL) cells (asterisk in Figure 1C). If bacteria grown overnight in LB  
138 medium were subcultured for 3.5 h in LB medium, few EL cells (asterisk in Figure 1D) and  
139 numerous ED cells (arrowheads in Figure 1D) were detected. The averaged cytoplasmic  
140 electron density was  $176 \pm 60$  MGV and  $354 \pm 78$  MGV for EL and ED cells, respectively  
141 (Figure 1E). In addition, we quantified differences in the MGV of the bacterial cytoplasm and  
142 the background per image, revealing higher values of electron densities for ED cells  
143 independently in every frame (Figure S1A). Their averaged value (Figure S1B) was very  
144 similar to the mean of pooled data, with a significant difference of electron density between  
145 EL and ED cells (Figure 1E and S1B-C). Moreover, nanostructures as well as the periplasm  
146 were indistinguishable in ED cells, contrary to EL cell ultrastructure. Both cell types were  
147 visible during cell division as an evidence of their high viability (Figure 1D, arrows). In  
148 addition, in stationary LB cultures (Figure S1EG), we found some dying cells, with partially  
149 or completely loss of inner membranes, signs of molecular condensation (dark spots, arrows  
150 in Figure S1E), and/or lysis (the arrowhead in Figure S1G). These profiles also were frequent  
151 in STM WT of stationary PCN cultures, however, independently of medium pH or nutritional  
152 supplementations (Fig S1IKM). In 3.5 h subcultures of corresponding media, dying profiles  
153 were only sporadically found.

154 Hence depending on growth conditions, bacterial populations consist of either ultrastructural  
155 similar cells, or cells divergent in cytoplasmic electron densities.

### 156 ***Controlled induction of STM ultrastructural diversity***

157 In order to find a correlation between ultrastructural types and environmental stress factors,  
158 we deployed a STM  $\Delta sodAB$  strain deficient in both cytoplasmic superoxide dismutases SodA  
159 and SodB. STM  $\Delta sodAB$  is especially sensitive to oxidative stress and turned out to be fragile,  
160 being able to grow in LB rich medium, but not in PCN minimal medium (41). Populations of



12.09.2020

Intracellular *Salmonella* ultrastructural heterogeneity

161 STM  $\Delta sodAB$  showed ED and EL cells with ultrastructural features as STM WT (Figure S1F-  
162 G and 1F), however the EL cell type was dominant (Figure 1G-H, star). Next, we induced  
163 oxidative stress by adding methyl viologen ('paraquat', PQ), a redox-active compound  
164 producing superoxide. In the presence of PQ, STM  $\Delta sodAB$  expose to this toxic radical was  
165 prolonged. Treatment for 1 h with PQ at low concentrations of 1 or 5  $\mu$ M did not affect STM  
166  $\Delta sodAB$  growth on agar plates (similar number colony forming units, CFU). TEM revealed  
167 that these treatments caused increase in frequency of ED cells (Figure 1I-L, arrowheads) in a  
168 dose-dependent manner, supporting its specificity to PQ treatment (Figure 1L). These results  
169 suggest that ED cells represent a type responding to cellular stress induced i.e. by ROS.

170 To further scrutinize the link between ultrastructure and cellular stress, we analyzed STM  
171  $\Delta sodAB$  for abnormalities. STM  $\Delta sodAB$  showed abnormal colony growth on agar plates  
172 when compared to STM WT, forming evidently smaller colonies at comparable number  
173 (Figure 2AB). Slower colony growth could be a result of cell division defects, high level of  
174 cell death and/or just slower growth. As revealed by TEM, cells of STM  $\Delta sodAB$  were rod-  
175 shaped and of similar size to STM WT without any signs of higher cellular death (Figure  
176 S1D-G). In addition, we assessed the membrane integrity using propidium iodide (PI) (Figure  
177 2C-N). PI is a red-fluorescent dye binding to DNA, which is not membrane-permeable, thus  
178 DNA staining reports membrane damages (46). STM  $\Delta sodAB$  showed up to 5% of PI-positive  
179 cells at average without treatment (Figure 2C and S2), and even less PI-positive cells directly  
180 after incubation with 1 or 5  $\mu$ M PQ (Figure 2DFH and S2A). We performed PI staining again  
181 12 h after PQ treatment and found high numbers of PI-positive cells in a group treated with  
182 5  $\mu$ M PQ, suggesting membrane stress and initiation of progressive membrane injury (Figure  
183 2EGH). Furthermore, ultrastructural analysis of STM  $\Delta sodAB$  revealed high number of cells  
184 with membrane invaginations. These were often asymmetrical, and single or multiple events  
185 occurred, which were differently located also including cell poles, therefore representing

12.09.2020

## Intracellular *Salmonella* ultrastructural heterogeneity

186 abnormal cell envelopes. These features were also present in  $\Delta sodAB$  without treatment, but  
187 increased after PQ treatment, suggesting oxidative stress as cause of this defect (Figure 2I-M,  
188 arrowheads). After treatment with 5  $\mu\text{M}$  PQ, high-resolution analysis revealed cell profiles  
189 with damaged inner and outer membranes, manifested by a loss of integrity and a leakage of  
190 cytoplasmic content, (Figure 2NO), in a line with PI analysis. Foci of lysis were also present  
191 after PQ treatment (asterisks in Figure 2LN). Hence, PQ treatment of STM  $\Delta sodAB$  enhanced  
192 cellular stress and could be toxic to cells.

### 193 *Induction of ultrastructural heterogeneity of STM WT in PCN medium*

194 We confirmed that PQ concentrations higher than 50  $\mu\text{M}$  were potent to induce membrane  
195 stress in STM WT in a similar fashion as in  $\Delta sodAB$ , significantly raising the number of PI-  
196 positive cells and PI fluorescence intensity (Figure S2B). Exposure to 50  $\mu\text{M}$  PQ achieved  
197 almost 70% PI-positive cells directly after treatment (Figure S2A). As pathogenic bacterium,  
198 STM possesses multiple stress response systems that activate repair mechanisms to protect  
199 from oxidative stress, thus increasing the chance to survive PQ treatment (47). Therefore, we  
200 defined a toxic PQ concentration which reduced the number of viable STM, and analyzed the  
201 ultrastructure of STM WT after PQ treatment in various growth conditions (Figure S3). PCN  
202 medium at pH 5.8 was also used to mimic the acidic phagosomal lumen of macrophages,  
203 where superoxide is protonated, capable to pass bacterial membranes but less spontaneously  
204 dismutates into hydrogen peroxide (2, 48). STM WT grown o/n in PCN medium at pH 7.4  
205 was inoculated in the same medium and grown further for 3.5 h. PQ treatments were always  
206 performed in PCN medium with reduced concentration of inorganic phosphate ( $P_i$ ) of 0.4  
207 mM, since  $P_i$  could compete with PQ during transport through bacterial membranes (49). A  
208 shift from the growth medium to a medium of acidic pH had lesser impact on colony growth,  
209 in comparison to bacteria shifted to medium of 7.4 pH, 96% of STM WT survived shift to pH  
210 5.8, compared to shift to pH 7.4. After treatment with 100  $\mu\text{M}$  PQ, significant drop of survival

12.09.2020

## Intracellular *Salmonella* ultrastructural heterogeneity

211 to 20% or less of controls was observed at both pH values. Treatments with higher PQ  
212 concentrations such as 500  $\mu$ M or 1 mM, further reduced survival of STM WT, however,  
213 remained above 10% of controls (Figure S3W). TEM analysis of PQ-treated samples and  
214 controls revealed that in all conditions bacterial cells were uniform in ultrastructural  
215 appearance when cultured in PCN at pH 7.4 or pH 5.8 without AA supplementation (Figure  
216 3AB and S3A-F). After PQ treatment, the cytoplasm was denser but ultrastructures like inner  
217 membranes, ribosomes or DNA were easily distinguishable. We did not find ED cells and we  
218 also did not find many cells with profiles of ultrastructural abnormalities (Figure S3A-L). It is  
219 possible that in PCN medium with limited nutrients, bacteria were not capable to switch to an  
220 emergency mode after PQ treatment, what would explain absence of ED cells and poor  
221 growth on agar plates.

222 To test this hypothesis, we performed the same experiments in PCN medium supplemented  
223 with AA (Figure 3C-F). STM survival after 1 mM PQ treatment was only higher when  
224 cultured in PCN medium pH 7.4 supplemented with AA, in contrast to STM grown without  
225 AA, or in PCN medium with a pH of 5.8 (Figure 3G). This was in line with the presence or  
226 lack of bacteria with ED type. ED cells emerged only in PCN pH 7.4 medium when  
227 supplemented with AA (Figure 3D). Treatments with lower PQ concentrations did not affect  
228 STM ultrastructure in PCN medium supplemented with AA (Figure S3M-O). For comparison,  
229 we also investigated the impact of other stress conditions on STM ultrastructure (Figure S3P-  
230 V). ED type was not observed after an osmotic shock or heat shock. It occurred after acid  
231 shock (shift to pH 3.0) of STM subcultured in PCN, pH 7.4 with AA supplementation, but not  
232 after subculture in PCN, pH 5.8. We observed other ultrastructural features, which were  
233 shock-specific to respective shock conditions and never observed in bacteria of control  
234 cultures. We compared presence of bacteria with shrinkage and/or lysis features since such  
235 profiles were observed in normal growth conditions (Figure S3Y). Cells with shrinkage  
236 and/or lysis features dominated the population after hyper osmotic stress in presence of

12.09.2020

## Intracellular *Salmonella* ultrastructural heterogeneity

237 600 mM NaCl (shrinkage: 82.8-fold increase compared to untreated and 74.6% of total cells;  
238 lysis: 18.7-fold increase compared to untreated, 16.9% of total) (Figure S3U). Obvious  
239 increase of STM with signs of shrinkage and/or lysis was also observed after pH shock (pH  
240 3.0) and was more pronounced when cells were subcultured at neutral pH. Simultaneous  
241 treatment with 1 mM PQ during pH shock resulted in comparable frequencies, suggesting  
242 only minor or no impact of PQ on causing shrinkage or lysis. This was in line with a low  
243 frequency of signs of shrinkage and/or lysis (< 10%) after PQ treatment in all other tested  
244 conditions (Figure S3Y) Hence, occurrence of ED type is induced by environmental stress  
245 and requires presence of AA.

### 246 ***Ultrastructural diversity of intracellular STM***

247 STM is able to replicate within eukaryotic cells where it encounters host cell defense  
248 mechanisms, as well as harsh phagosomal environments and nutritional limitations (40, 50).  
249 To correlate the ultrastructural features to intracellular phenotypes, we examined the  
250 ultrastructure of STM in HeLa cells at 8 h or 16 h post infection (p.i.). At both time points,  
251 host cells were either intact, with or without intracellular STM, or dying and ruptured as result  
252 of bacterial hyper-replication. Within healthy host cells, we found EL STM WT as well as  
253 mixed populations with EL and ED cells similarly to STM in LB medium (Figure 4). Both  
254 types were located within SCVs and showed signs of cell division. These data confirmed that  
255 ultrastructural EL and ED types are natural morphotypes of STM.

### 256 ***Metabolic activity of intracellular STM***

257 In order to test vitality and biosynthetic capability of distinct morphotypes of STM, we used  
258 an episomal encoded dual-color fluorescence reporter (Figure S4A) (51). Bacteria harboring  
259 the reporter constitutively express *gfp*. To report viability and biosynthetic capacity, we  
260 monitored *dsred* expression regulated by the anhydrotetracycline (AHT)-inducible *tetA*  
261 promoter (52). We considered cells as biosynthetic active when DsRed was detected after  
262 AHT induction.

12.09.2020

## Intracellular *Salmonella* ultrastructural heterogeneity

263 First, we tested reporter functionality by flow cytometry (Figure S4BCD). STM WT  
264 harboring the reporter was subcultured to late-logarithmic growth phase in LB medium. AHT  
265 was added after 3 h of growth, with or without chloramphenicol (Cm) to inhibit protein  
266 biosynthesis DsRed-positive cells were already detected 0.5-1 h after AHT induction. DsRed  
267 fluorescence intensity increased rapidly at 1.5-3 h post induction. Without AHT induction, or  
268 AHT induction in presence of Cm, no DsRed-positive cells were detected, verifying that  
269 inducible expression of *dsred* can be used as a marker for biosynthetic capability (Figure  
270 S4CD). We were also able to visualize metabolically active STM by live-cell fluorescence  
271 microscopy (FM) of infected host cells, supporting that the reporter can be used to study the  
272 metabolic status of intracellular STM (Figure S4E). We investigated infected HeLa LAMP1-  
273 GFP cells 8 h or 16 h p.i. (Figure 5). The intracellular population was heterogeneous based on  
274 protein synthesis and divergent when compared between infected host cells consisting of  
275 either only metabolically active or mixed metabolically active and inactive STM.  
276 Previous TEM analysis showed that host cell viability decreased when containing high burden  
277 of intracellular bacteria. Using LAMP1-GFP as marker we could assess *Salmonella*-induced  
278 endosomal remodeling (Figure 5A). We also observed lack of these compartments (Figure  
279 5B) possibly due to activation of death processes in the host or due to their rupture by  
280 escaping STM into the host cell cytoplasm. Presence of individual metabolically inactive  
281 STM within a population of metabolically active STM raised the possibility that inactive  
282 STM are viable. Bacteria may form persisters with ceased growth, highly reduced  
283 metabolism, and ability to return to normal growth after release from stressful conditions. To  
284 scrutinize the bacterial conditions in host cells further, we applied correlative light and  
285 electron microscopy (CLEM).

### 286 ***CLEM with the dual-color reporter strains***

287 We modified a previous CLEM approach to accelerate data collection and further applied  
288 deconvolution of FM data (Figure S5) (53). We observed intracellular STM populations

12.09.2020

## Intracellular *Salmonella* ultrastructural heterogeneity

289 consisting of ED and EL cell types (72.7% ED cell type, 27.2% EL cell type), which were  
290 also visualized during cell division (Figure 6A, Ac). Highly electron-lucent single bacteria  
291 were found just once per ROI showing clearly visible outer membrane, outlined periplasm,  
292 and produced DsRed at high level (Figure 6Ad, Ba-b). However, there was no strict  
293 correlation of metabolically active, less active, or non-active STM with any of electron  
294 density-based morphotypes. We found both, ED and EL types strongly (34.4% of ED and  
295 41.7% of EL) or slightly (18.8% of ED and 16.7% of EL) marked for DsRed expression. In  
296 addition, 46.9% of ED and 41.7% of EL cells showed metabolic inactivity. In ROIs with high  
297 numbers of STM, we detected clear differences in bacterial size, with an area of  $1.76 \pm 0.25$   
298  $\mu\text{m}^2$  (wide) or  $0.96 \pm 0.18 \mu\text{m}^2$  (thin), which were only partially correlated with the electron  
299 density type (Figure 6A). Interestingly, size-based classes were rather grouped in the host cell  
300 with 'wide' STM located more centrally and 'thin' STM located on the cell peripheries  
301 (Figure 6A). Thin STM were highly metabolically active, while ED wide cells had no or  
302 minor expression of DsRed, localized to small patches. Dividing STM of both, ED and EL  
303 types, were wide and less metabolically active. Some bacteria were devoid of SCV and  
304 located in the host cell cytoplasm (Figure 6Ac). Complete SCV or SIF were not present, in  
305 line with lack of LAMP1-GFP signal. Contrary, lysosomes, endosomes and autophagic  
306 structures were present in a region with many thin and metabolically active STM, however,  
307 were not visible within degradative organelles.

308 All together, these data provide further evidence for the existence of different ultrastructural  
309 classes. Furthermore, we found STM cells with special features (Figure 7). It had clear  
310 condensations of structures in the cytoplasm with a dense layer surrounding loose materials in  
311 the center (halo-like condensation). Correlation of fluorescence signals with the ultrastructural  
312 profile showed that the 'halo'-like electron density contained GFP and DsRed. The  
313 biosynthetic activity of this cell was at high level, suggesting high vitality. At the poles, lucent

12.09.2020

## Intracellular *Salmonella* ultrastructural heterogeneity

314 blebs of regular size and shape were visible suggesting that they were not lysis spots. The  
315 inner bacterial membrane in proximity of lucent blebs was intact (Figure 7BC).

316 Hence, the CLEM approach had sufficient resolution to visualize distinct DsRed/GFP  
317 distributions inside bacteria in correlation with the ultrastructure.

### 318 *The 'halo' type of bacteria*

319 We noticed presence of STM with halo-like condensations in the cytoplasm also in o/n LB  
320 cultures, what allowed for quantifications of this type. Cells with halo-like condensation had  
321 centrally located lucent region, occupying 39-55% of the whole cell area ( $48.5\% \pm 4.9$ ).  
322 Quantification revealed that cultures in late-logarithmically growth did not contain any cells  
323 with halo-like condensations, in contrast to stationary cultures (o/n) (Figure 8A). Moreover,  
324 the  $\Delta sodAB$  strain more frequently formed halo-like structures, suggesting a link between  
325 stress and 'halo' ultrastructure (Figure 8A). In contrast, we did not detect halo-like  
326 condensations in any STM cell cultured in PCN medium, independently of growth phase, pH,  
327 AA supplementation, or even shock conditions.

328 We further tested to induce experimentally the appearance of the halo-like type. UV light of  
329 wavelengths of 290-320 nm (UVB), or 254 nm (UVC) are highly bactericidal (54). Therefore,  
330 STM WT cultured in LB medium was analyzed by TEM after UV treatment, which resulted  
331 in complete lack of colony growth on agar plates (Figure 8B-C and S6A-E). The  
332 ultrastructural profiles of UV-treated STM were classified, revealing reduced numbers of EL  
333 type when compared to untreated cells. ED profiles were slightly more frequent, together with  
334 profiles showing signs of cellular death. UV treatment induced formation of the halo-like type  
335 to almost the frequency observed for STM  $\Delta sodAB$  (Figure 8ABC, arrowhead). Hence, there  
336 is a correlation of the halo-like type frequency with occurrence of cell death induced by UV  
337 illumination.

338 We also determined biosynthetic capacity after UV treatment and found significant reduction  
339 in DsRed production (Figure S6E). Surprisingly, DsRed was synthesized after UV treatment,

12.09.2020

## Intracellular *Salmonella* ultrastructural heterogeneity

340 while no colony growth was observed (Figure S6EF). We analyzed infected host cells with  
341 respect to presence of halo-like morphotype and found that this type dominated intracellular  
342 populations in case of hyper-replication, when bacteria were leaving the host, or host cells  
343 were necrotic (Figure 8D-I, arrowheads). In infection experiments, the antibiotic gentamicin  
344 is used to kill extracellular bacteria, while intracellular bacteria are protected. We tested if  
345 gentamicin could be a cause for the increase of the halo-like type in infection experiments,  
346 however, treatment of STM cultures with gentamicin did not recapitulate this result (data not  
347 shown).

348 After growth in rich media like LB cultures, halo-like morphotype was about 10%, suggesting  
349 low exposure to cell-damaging agents. Within host cells, the impact on ultrastructural  
350 characteristics of STM was more dramatic. Taken together, these results demonstrate that the  
351 halo-like type could be an indicator of exposure of STM to critical environmental conditions.

352



12.09.2020

## Intracellular *Salmonella* ultrastructural heterogeneity

### 353 **Discussion**

354 In this work, we present evidence that several morphotypes of viable bacteria exist. Based on  
355 ultrastructural criteria, these morphotypes differ significantly in cytoplasmic electron density,  
356 which is well distinguishable at low EM resolution (1,000-2,000-fold magnification, 50 keV),  
357 as well as in organization and visibility of defined (chromosome, ribosomes) and undefined  
358 structures (dense cytoplasmic areas). We present EL and ED types of STM, representing  
359 viable bacteria active for protein biosynthesis and/or able to divide. The frequency of  
360 morphotypes in a bacterial population can be used as an indicator of environmental changes,  
361 what in turn enables new ways of EM data interpretation. Moreover, ultrastructural  
362 heterogeneity is not limited to *Salmonella enterica*, since published TEM micrographs of  
363 other bacteria demonstrate morphotypes similar to EL, ED, as well as halo-like type. These  
364 types seem to be neither restricted to Gram-negative nor pathogenic bacteria. Their examples  
365 have been visualized intracellular in both, cell cultures and infected animals previously, and  
366 were not restricted to mammalian cells (22-34). However, the nature or function of the  
367 ultrastructural diversity remained enigmatic.

368 Here, we provide evidence that the ultrastructural heterogeneity, other than death-related, is  
369 associated with environmental changes. We further demonstrated that the external AA  
370 supplementation is required for ED induction and that the oxidative stress-dependent  
371 formation of ED bacteria only takes place in nutrient-rich medium. In contrast, ED cells were  
372 hardly inducible by oxidative stress in minimal media, which did not contain AA.  
373 Furthermore, induction of ED type is pH sensitive with restriction to a phagosomal pH.  
374 Consistently with weak survival capabilities, the lack of obvious ED type in PCN medium  
375 despite oxidative stress, may reflect difficulties of cells to respond properly. Recently, a  
376 morphotype reminiscent with ED has been described in *E. coli*, as representative of healthy  
377 cells (12, 55). In addition, we have identified the very characteristic halo-like type, which  
378 dominates bacterial populations exposed to extreme conditions. This type occurred

12.09.2020

## Intracellular *Salmonella* ultrastructural heterogeneity

379 sporadically in stationary phase and is increased in cultures after bactericidal UV treatment,  
380 pointing to its link with deadly noxes. CLEM analysis of halo-like type suggests that the  
381 dense matter around the DNA-containing center is of proteinaceous nature since GFP and  
382 DsRed were located within this area. At this moment we do not know the underlying  
383 mechanisms of different cytoplasmic states at the ultrastructural level but one possible  
384 explanation for ED type can be macromolecular crowding as a result of stress response (56,  
385 57). Previously, molecular crowding has been demonstrated in *E. coli* after osmotic up-shift,  
386 affecting diffusion of GFP. These changes were accompanied by dramatic cytoplasmic  
387 shrinkage, which was only sporadically observed at the cell poles by TEM in our experiments  
388 (58, 59).

389 Global and dramatic ultrastructural alterations of bacteria occurred very fast, because  
390 differences were visible by TEM when cells were fixed directly after stress treatment. On the  
391 other side, dead and dying bacterial cells, according to ultrastructural criteria like membrane  
392 injuries, lysis, and/or leakage of content are not frequent, even after bactericidal UV  
393 applications or after shock conditions. This suggests that STM can be alive for a long time  
394 without being capable to form colonies. We also visualized cells at high resolution to clearly  
395 discriminate between lysis and storage granules or other electron-lucent components not  
396 related with death (this study; 19, 58), and between molecular condensation and protein-based  
397 organelles like carboxisomes (19, 60). Except ruptures and detachments, membrane waving  
398 and surface protrusions cannot be interpreted with convenience as indicators of deadly  
399 membrane stress, since they may reflect adaptive activity of cells, i.e. changes in membrane  
400 fluidity or vesicle formation (61-66). Criteria for dying cells were found in EL, ED and halo-  
401 like type, exhibiting severity stages as intermediates of death processes, different cellular  
402 location and mix of criteria.

403 Taken together, our study sheds more light on ultrastructural heterogeneity of STM and  
404 revealed possible EM indicators, which allow to broaden EM data interpretation. Since the

12.09.2020

## Intracellular *Salmonella* ultrastructural heterogeneity

405 ED type could serve as indicator for oxidative stress, and the halo-like type as an indicator for  
406 hazardous environmental conditions, future research infection in biology will benefit, because  
407 these indicators may be used when detailed analyses are difficult or impossible. For example,  
408 when bacterial populations *in vivo* in deep tissues are investigated or populations not  
409 compatible with reporter systems are analyzed as for example free-living microorganisms,  
410 which were directly analyzed without cultivation.

411

### 412 ***Acknowledgements***

413 This work was supported by the DFG by grant P15 and the Z project in SFB 944. The  
414 excellent technical assistance of Birgit Hemmis and Britta Brickwedde is kindly  
415 acknowledged.

416

12.09.2020

Intracellular *Salmonella* ultrastructural heterogeneity

## 417 **Materials and Methods**

### 418 ***Bacterial strains and growth conditions***

419 *Salmonella enterica* serovar Typhimurium strain NCTC12023 (STM) was used as wild-type  
420 strain and isogenic strain MvP2400 ( $\Delta sodA::FRT \Delta sodB::FRT$ ) has been described (41).  
421 Bacteria were cultured in lysogeny broth (LB), or PCN medium supplemented with 0.4 mM  
422 (for paraquat treatment) or 25 mM  $PO_4^-$  (44, 45) at pH of 5.8 or 7.4 at 37 °C with aeration.  
423 Optionally, medium was supplemented with an 1 x mix of 20 amino acids (alanine (0.8 mM),  
424 arginine (5.2 mM), asparagine (0.4 mM), aspartate (0.4 mM), cysteine (0.1 mM), glutamic  
425 acid (0.6 mM), glutamine (0.6 mM), glycine (0.8 mM), histidine (0.2 mM), isoleucine (0.4  
426 mM), leucine (0.8 mM), lysine (0.4 mM), methionine (0.2 mM), phenylalanine (0.4 mM),  
427 proline (0.4 mM), serine (10.0 mM), threonine (0.4 mM), tryptophan (0.1 mM), tyrosine (0.2  
428 mM), valine (0.6 mM)) (44). When required, carbenicillin or chloramphenicol were added at  
429 50  $\mu g \times ml^{-1}$  or 200  $\mu g \times ml^{-1}$ , respectively. For live cell imaging and flow cytometry analysis  
430 of bacterial metabolic activity, the strains harbored plasmid pWRG658 ( $P_{rpsM}::gfpmut3A tetR$   
431  $P_{tetA}::dsRed T3_S4T$ ) (51) for constitutive expression of *gfp* and AHT-inducible expression of  
432 *dsred*.

### 433 ***AHT induction***

434 AHT (Fluka, Sigma-Aldrich) stock solutions were stored in aliquots of 200  $\mu g \times ml^{-1}$  in  
435 dimethylformamide (DMF) at -20 °C in the dark. For induction of expression of the  $P_{tetA}$ -  
436 controlled dual-color vitality sensor, AHT was added directly to LB broth or cell culture  
437 medium to a concentration of 100  $ng \times ml^{-1}$  as indicated.

### 438 ***Propidium iodide staining of STM***

439 Propidium iodide (PI) (Sigma-Aldrich) was used as described (67) to analyze cell envelope  
440 integrity at a concentration of 30  $\mu M$  in PBS. STM was cultured as indicated, PI was added,  
441 and incubated for 10 min in the dark. Subsequently, bacteria were washed twice by

12.09.2020

## Intracellular *Salmonella* ultrastructural heterogeneity

442 centrifugation (5,000 x g, 5 min) in the same buffer, 5  $\mu$ l of diluted bacteria were put on a  
443 glass slide, covered with a cover slip and imaged by the Zeiss LSM (Zeiss).

### 444 ***Stress induction by methyl viologen, heat, hyper- or hypo-osmolarity***

445 STM strains were cultured overnight as indicated, diluted 1:31 in fresh medium, subcultured  
446 for further 3.5 h, shifted to fresh PCN medium as indicated and exposed to methyl viologen  
447 (Sigma-Aldrich) for 1 h at RT without shaking, to 80 °C (in PCN medium pH 7.4) or to  
448 hyper-osmolar (PCN medium pH 7.4 containing 600 mM NaCl) or hypo-osmolar conditions  
449 (pure H<sub>2</sub>O<sub>dd</sub>) for 2 h. Effect of methyl viologen was confirmed by plating of bacteria onto LB  
450 plates. Subsequently, bacteria were processed for PI staining or TEM as described above or  
451 below, respectively.

### 452 ***UV inactivation of STM***

453 Overnight cultures of STM were grown in LB broth, normalized to an OD<sub>600</sub> of 0.2 in PBS  
454 and transferred to a petri dish following irradiation with UV light (305 nm) for 60 sec.  
455 Successful UV inactivation was always confirmed by plating of inactivated bacterial  
456 suspension onto LB plates. If indicated, inactivated bacteria were processed for EM as  
457 described below.

### 458 ***Flow cytometry analysis***

459 Overnight cultures of STM were grown in LB broth, diluted 1:31 in fresh LB and subcultured  
460 for further 6 h. At indicated time points, samples were taken, diluted in PBS and directly  
461 subjected to flow cytometry without fixation. Flow cytometry was performed on an Attune  
462 NxT instrument (ThermoFischer Scientific) at a flow rate of 25  $\mu$ l x min<sup>-1</sup>. At least 50,000  
463 bacteria were gated by virtue of the constitutive GFP fluorescence. The percentage of DsRed-  
464 positive bacteria was determined, the intensity of the DsRed fluorescence per gated STM cell  
465 was recorded and x-medians for DsRed intensities were calculated.

### 466 ***Cell lines and cell culture***

12.09.2020

## Intracellular *Salmonella* ultrastructural heterogeneity

467 For infection experiments the non-polarized epithelial cell line HeLa (American Type Culture  
468 Collection, ATCC no. CCL-2) stably transfected with LAMP1-GFP was used. HeLa cells  
469 were cultured in Dulbecco's modified Eagle's medium (DMEM) containing  $4.5 \text{ g x l}^{-1}$   
470 glucose, 4 mM stable glutamine and sodium pyruvate (Biochrom) and supplemented with  
471 10% inactivated fetal calf serum (iFCS) (Sigma-Aldrich) at 37 °C, 5% CO<sub>2</sub> and 90%  
472 humidity.

### 473 *Host cell infection*

474 For infection of HeLa LAMP1-GFP cells, *Salmonella* strains were grown overnight in LB  
475 broth, diluted 1:31 in fresh LB and subcultured for further 3.5 h to induce maximal  
476 invasiveness. Infection was performed with a multiplicity of infection (MOI) of 50 for 25 min  
477 at 37 °C, 5% CO<sub>2</sub> and 90% humidity. Subsequently, cells were washed thrice with PBS and  
478 incubated for 1 h with medium containing  $100 \text{ mg x ml}^{-1}$  gentamicin (Applichem) to kill all  
479 non-invaded bacteria. Afterwards, the medium was replaced by medium containing  $10 \text{ mg x}$   
480  $\text{mL}^{-1}$  gentamicin until the end of the experiment.

### 481 *Live cell imaging and image deconvolution*

482 For live cell imaging, DMEM was replaced by imaging medium consisting of Minimal  
483 Essential Medium (MEM) with Earle's salts, without NaHCO<sub>3</sub>, without L-glutamine and  
484 without phenol red (Biochrom) supplemented with 30 mM HEPES (4-(2-hydroxyethyl)- 1-  
485 piperazineethanesulfonic acid) (Sigma-Aldrich) with a pH of 7.4. For imaging of fixed cells,  
486 cells were washed thrice with PBS and incubated for 15 min with PBS containing 3% *para*-  
487 formaldehyde (PFA) to ensure complete fixation of cells. Subsequently, cells were washed  
488 thrice with PBS and blocked with blocking solution containing 2% bovine serum albumin and  
489 2% goat serum in PBS. Fluorescence imaging was performed using the confocal laser-  
490 scanning microscope (CLSM) Leica SP5. For setting adjustment, image acquisition and  
491 image processing the software LAS AF (Leica, Wetzlar, Germany) was used. Image

12.09.2020

## Intracellular *Salmonella* ultrastructural heterogeneity

492 acquisition was performed using objectives 10x (HC PL FL 10x, NA 0.3), 20x (HC PL APO  
493 CS 20x, NA 0.7), 40x (HCX PL APO CS 40x, NA 1.25–0.75) and 100x objective (HCX PL  
494 APO CS 100x, NA 1.4–0.7) (Leica, Wetzlar, Germany) and the polychromic mirror TD  
495 488/543/633 for the three channels GFP, DsRed and DIC. For CLEM experiments, images  
496 were further deconvoluted using Huygens software (Scientific Volume Imaging B.V.,  
497 Hilversum, The Netherlands) to better correlate the expression patterns of DsRed to the  
498 bacterial ultrastructure. Live cell imaging was performed using the Zeiss Cell Observer  
499 microscope with Yokogawa Spinning Disc Unit CSU-X1a, Evolve EMCCD camera  
500 (Photometrics, USA) and live cell periphery, equipped with an Alpha Plan-Apochromat 63x  
501 (NA 1.46) oil immersion objective (Zeiss, Oberkochen, Germany). Following filter  
502 combinations were used for image acquisition: GFP with BP 525/50, DsRed with LP 580 and  
503 processed by the ZEN 2012 (Zeiss, Oberkochen, Germany) software. Scale bars for all  
504 acquired images were added with Photoshop CS6 (Adobe).

### 505 *Sample preparation for TEM*

506 STM cultured either in LB or PCN medium were fixed with 2.5% glutaraldehyde (GA)  
507 (Electron Microscopy Science) in 100 mM phosphate buffer (81.8 mM Na<sub>2</sub>HPO<sub>4</sub> and 18.2  
508 mM KH<sub>2</sub>PO<sub>4</sub>, pH 7.2) over night at 4 °C. Unreacted aldehydes were blocked with 100 mM  
509 glycine in buffer for 15 min. Osmification was performed with 1% osmium tetroxide  
510 (Electron Microscopy Science) in 100 mM phosphate buffer for 60 min on ice following  
511 washing several times with phosphate buffer and ultrapure water (MilliQ). Subsequently,  
512 contrasting with 1% uranyl acetate (Electron Microscopy Science) in MilliQ for 30 min was  
513 performed following several washing steps. Afterwards, cells were dehydrated in a cold  
514 graded ethanol series finally rinsing once in anhydrous ethanol and twice in anhydrous  
515 acetone at room temperature. Infiltration was performed in mixes of acetone and EPON812  
516 (Serva). After every incubation or washing step bacteria were centrifuged (2000 x g, 3 min),  
517 the supernatant was discarded followed by the next preparation step.

12.09.2020

## Intracellular *Salmonella* ultrastructural heterogeneity

### 518 ***Sample preparation for CLEM***

519 Two days prior to infection HeLa LAMP1-GFP cells ( $1 \times 10^5$ ) were seeded onto a gridded  
520 coverslip in a petri dish (MatTek, Ashland, MA). 14 h p.i.  $100 \text{ ng} \times \text{ml}^{-1}$  AHT was added to  
521 the cells for induction of reporter plasmid. 16 h p.i. cells were pre-fixed with pre-warmed  
522 2.5% GA in 0.1 M phosphate buffer for 15 min at 37 °C. After washing the cells thrice with  
523 PBS, ROIs were documented and images were acquired. Subsequently, further fixation was  
524 performed using 2.5% GA in 0.1 M phosphate buffer over night at 4 °C. Quenching,  
525 osmification and contrasting was performed as described above. Then, the gridded coverslip  
526 was removed from the petri dish and was transferred to a glass dish. Afterwards, cells were  
527 dehydrated in a cold graded ethanol series, finally rinsing once in anhydrous ethanol and  
528 twice in anhydrous acetone at room temperature. Infiltration and flat-embedding were  
529 performed in mixes of acetone and EPON812 (Serva). During the removal of the gridded  
530 coverslip from the polymerized EPON the engraved coordinates were transferred to the  
531 EPON surface and allowed easy relocation by microscopy. ROIs were cut using a scalpel and  
532 were transferred to an EPON block. Serial 200 nm sections were generated by an  
533 ultramicrotome (Leica EM UC7) and collected on formvar-coated copper EM slot grids.

### 534 ***Transmission electron microscopy***

535 High-resolution analysis including CLEM was performed using the Libra 120 TEM (Zeiss,  
536 Oberkochen, Germany) operating at 120 keV and equipped with an Omega energy filter and a  
537 2,000×2,000-pixel digital camera (Troendle). In addition, TEM was performed using a Zeiss  
538 902 system (Zeiss, Oberkochen, Germany) operating at 50 keV. Images were taken with the  
539 software ImageSP (TRS image SysProg, Moorenwies, Germany). TEM micrographs were  
540 adjusted for brightness and contrast enhanced using ImageJ or Photoshop software when  
541 necessary. For image analysis, software ImageJ (<http://rsbweb.nih.gov/ij/>) was used. Stitching  
542 and overlay of CLSM and TEM images were done using Photoshop CS6 (Adobe).

543



544 **References**

- 545 1. Avraham R, Haseley N, Brown D, Penaranda C, Jijon HB, Trombetta JJ, Satija R,  
546 Shalek AK, Xavier RJ, Regev A, Hung DT. 2015. Pathogen Cell-to-Cell Variability  
547 Drives Heterogeneity in Host Immune Responses. *Cell* 162:1309-1321.
- 548 2. Burton NA, Schürmann N, Casse O, Steeb AK, Claudi B, Zankl J, Schmidt A,  
549 Bumann D. 2014. Disparate impact of oxidative host defenses determines the fate of  
550 *Salmonella* during systemic infection in mice. *Cell Host and Microbe* 15:72-83.
- 551 3. Claudi B, Spröte P, Chirkova A, Personnic N, Zankl J, Schürmann N, Schmidt A,  
552 Bumann D. 2014. Phenotypic variation of *Salmonella* in host tissues delays  
553 eradication by antimicrobial chemotherapy. *Cell* 158:722-733.
- 554 4. Helaine S, Cheverton AM, Watson KG, Faure LM, Matthews SA, Holden DW. 2014.  
555 Internalization of *Salmonella* by macrophages induces formation of nonreplicating  
556 persisters. *Science* 343:204-8.
- 557 5. Brenzinger S, van der Aart LT, van Wezel GP, Lacroix JM, Glatter T, Briegel A.  
558 2019. Structural and Proteomic Changes in Viable but Non-culturable *Vibrio cholerae*.  
559 *Front Microbiol* 10:793.
- 560 6. Khodaparast L, Khodaparast L, Gallardo R, Louros NN, Michiels E, Ramakrishnan R,  
561 Ramakers M, Claes F, Young L, Shahrooei M, Wilkinson H, Desager M, Mengistu  
562 Tadesse W, Nilsson KPR, Hammarstrom P, Aertsen A, Carpentier S, Van Eldere J,  
563 Rousseau F, Schymkowitz J. 2018. Aggregating sequences that occur in many proteins  
564 constitute weak spots of bacterial proteostasis. *Nat Commun* 9:866.
- 565 7. Lidstrom ME, Konopka MC. 2010. The role of physiological heterogeneity in  
566 microbial population behavior. *Nat Chem Biol* 6:705-12.
- 567 8. Fang FC, Frawley ER, Tapscott T, Vazquez-Torres A. 2016. Bacterial Stress  
568 Responses during Host Infection. *Cell Host Microbe* 20:133-43.
- 569 9. Fisher RA, Gollan B, Helaine S. 2017. Persistent bacterial infections and persister  
570 cells. *Nat Rev Microbiol* 15:453-464.
- 571 10. LaRock DL, Chaudhary A, Miller SI. 2015. Salmonellae interactions with host  
572 processes. *Nat Rev Microbiol* 13:191-205.
- 573 11. Konopka MC, Sochacki KA, Bratton BP, Shkel IA, Record MT, Weisshaar JC. 2009.  
574 Cytoplasmic protein mobility in osmotically stressed *Escherichia coli*. *J Bacteriol*  
575 191:231-7.
- 576 12. Wood TK, Song S, Yamasaki R. 2019. Ribosome dependence of persister cell  
577 formation and resuscitation. *J Microbiol* 57:213-219.
- 578 13. Parry BR, Surovtsev IV, Cabeen MT, O'Hern CS, Dufresne ER, Jacobs-Wagner C.  
579 2014. The bacterial cytoplasm has glass-like properties and is fluidized by metabolic  
580 activity. *Cell* 156:183-94.
- 581 14. Golding I, Cox EC. 2006. Physical nature of bacterial cytoplasm. *Phys Rev Lett*  
582 96:098102.
- 583 15. Yeates TO, Crowley CS, Tanaka S. 2010. Bacterial microcompartment organelles:  
584 protein shell structure and evolution. *Annu Rev Biophys* 39:185-205.
- 585 16. Mayer MJ, Juodeikis R, Brown IR, Frank S, Palmer DJ, Deery E, Beal DM, Xue WF,  
586 Warren MJ. 2016. Effect of bio-engineering on size, shape, composition and rigidity  
587 of bacterial microcompartments. *Sci Rep* 6:36899.
- 588 17. Hartmann M, Berditsch M, Hawecker J, Ardakani MF, Gerthsen D, Ulrich AS. 2010.  
589 Damage of the bacterial cell envelope by antimicrobial peptides gramicidin S and  
590 PGLa as revealed by transmission and scanning electron microscopy. *Antimicrobial*  
591 *Agents and Chemotherapy* 54:3132-3142.

12.09.2020

Intracellular *Salmonella* ultrastructural heterogeneity

- 592 18. Helander IM, Nurmiäho-Lassila EL, Ahvenainen R, Rhoades J, Roller S. 2001.  
593 Chitosan disrupt the barrier properties of the outer membrane of gram-negative  
594 bacteria. *International Journal of Food Microbiology* 71:235-244.
- 595 19. López-Heras M, Theodorou IG, Leo BF, Ryan MP, Porter AE. 2015. Towards  
596 understanding the antibacterial activity of Ag nanoparticles: electron microscopy in  
597 the analysis of the materials-biology interface in the lung. *Environmental Science:*  
598 *Nano* 2:312-326.
- 599 20. Yossa N, Patel J, Macarasin D, Millner P, Murphy C, Bauchan G, Lo YM. 2014.  
600 Antibacterial Activity of Cinnamaldehyde and Sporan against *Escherichia coli*  
601 O157:H7 and *Salmonella*. *Journal of Food Processing and Preservation* 38:749-757.
- 602 21. Zhang X, Ashby R, Solaiman D, Uknalis J, Fan X. 2016. Inactivation of  
603 *Salmonella* spp. and *Listeria* spp. by palmitic, stearic, and oleic acid sophorolipids and  
604 thiamine dilauryl sulfate. *Frontiers in Microbiology* 7:1-11.
- 605 22. Via LE, Deretic D, Ulmer RJ, Hibler NS, Huber LA, Deretic V. 1997. Arrest of  
606 mycobacterial phagosome maturation is caused by a block in vesicle fusion between  
607 stages controlled by rab5 and rab7. *J Biol Chem* 272:13326-31.
- 608 23. Garai P, Berry L, Moussouni M, Bleves S, Blanc-Potard AB. 2019. Killing from the  
609 inside: Intracellular role of T3SS in the fate of *Pseudomonas aeruginosa* within  
610 macrophages revealed by mgtC and oprF mutants. *PLoS Pathog* 15:e1007812.
- 611 24. Cueto JA, Rodriguez C, Vega IA, Castro-Vazquez A. 2015. Immune Defenses of the  
612 Invasive Apple Snail *Pomacea canaliculata* (Caenogastropoda, Ampullariidae):  
613 Phagocytic Hemocytes in the Circulation and the Kidney. *PLoS One* 10:e0123964.
- 614 25. Salah IB, Ghigo E, Drancourt M. 2009. Free-living amoebae, a training field for  
615 macrophage resistance of mycobacteria. *Clin Microbiol Infect* 15:894-905.
- 616 26. Lamrabet O, Mba Medie F, Drancourt M. 2012. *Acanthamoeba polyphaga*-enhanced  
617 growth of *Mycobacterium smegmatis*. *PLoS One* 7:e29833.
- 618 27. Lemmer Y, Kalombo L, Pietersen RD, Jones AT, Semete-Makokotlela B, Van  
619 Wyngaardt S, Ramalapa B, Stoltz AC, Baker B, Verschoor JA, Swai HS, de  
620 Chastellier C. 2015. Mycolic acids, a promising mycobacterial ligand for targeting of  
621 nanoencapsulated drugs in tuberculosis. *J Control Release* 211:94-104.
- 622 28. Chan LL, Mak JW, Ambu S, Chong PY. 2018. Identification and ultrastructural  
623 characterization of *Acanthamoeba* bacterial endocytobionts belonging to the  
624 Alphaproteobacteria class. *PLoS One* 13:e0204732.
- 625 29. Inglis TJ, Rigby P, Robertson TA, Dutton NS, Henderson M, Chang BJ. 2000.  
626 Interaction between *Burkholderia pseudomallei* and *Acanthamoeba* species results in  
627 coiling phagocytosis, endamebic bacterial survival, and escape. *Infect Immun*  
628 68:1681-6.
- 629 30. Szenasi Z, Endo T, Yagita K, Nagy E. 1998. Isolation, identification and increasing  
630 importance of 'free-living' amoebae causing human disease. *J Med Microbiol* 47:5-16.
- 631 31. Paquet VE, Charette SJ. 2016. Amoeba-resisting bacteria found in multilamellar  
632 bodies secreted by *Dictyostelium discoideum*: social amoebae can also package  
633 bacteria. *FEMS Microbiol Ecol* 92.
- 634 32. Marciano-Cabral F, Cabral G. 2003. *Acanthamoeba* spp. as agents of disease in  
635 humans. *Clin Microbiol Rev* 16:273-307.
- 636 33. Sedzicki J, Tschon T, Low SH, Willemart K, Goldie KN, Letesson JJ, Stahlberg H,  
637 Dehio C. 2018. 3D correlative electron microscopy reveals continuity of *Brucella*-  
638 containing vacuoles with the endoplasmic reticulum. *J Cell Sci* 131.
- 639 34. Zhang K, Dupont A, Torow N, Gohde F, Leschner S, Lienenklaus S, Weiss S,  
640 Brinkmann MM, Kuhnel M, Hensel M, Fulde M, Hornef MW. 2014. Age-dependent  
641 enterocyte invasion and microcolony formation by *Salmonella*. *PLoS Pathog*  
642 10:e1004385.

12.09.2020

Intracellular *Salmonella* ultrastructural heterogeneity

- 643 35. Silva TP, Gamalier JP, Melo RCN. 2016. TEM as an Important Tool to Study Aquatic  
644 Microorganisms and their Relationships with Ecological Processes, Modern Electron  
645 Microscopy in Physical and Life Sciences doi:10.5772/61804.
- 646 36. Liss V, Hensel M. 2015. Take the tube: Remodelling of the endosomal system by  
647 intracellular *Salmonella enterica*. Cellular Microbiology 17:639-647.
- 648 37. Gao Y, Spahn C, Heilemann M, Kenney LJ. 2018. The Pearling Transition Provides  
649 Evidence of Force-Driven Endosomal Tubulation during *Salmonella* Infection. mBio  
650 9.
- 651 38. Goser V, Kommnick C, Liss V, Hensel M. 2019. Self-Labeling Enzyme Tags for  
652 Analyses of Translocation of Type III Secretion System Effector Proteins. mBio 10.
- 653 39. Malik-Kale P, Jolly CE, Lathrop S, Winfree S, Luterbach C, Steele-Mortimer O. 2011.  
654 *Salmonella* - at home in the host cell. Frontiers in Microbiology 2:1-9.
- 655 40. Liss V, Swart AL, Kehl A, Hermanns N, Zhang Y, Chikkaballi D, Böhles N, Deiwick  
656 J, Hensel M. 2017. *Salmonella enterica* Remodels the Host Cell Endosomal System  
657 for Efficient Intravacuolar Nutrition. Cell Host & Microbe 21:390-402.
- 658 41. Noster J, Persicke M, Chao TC, Krone L, Heppner B, Hensel M, Hansmeier N. 2019.  
659 Impact of ROS-Induced Damage of TCA Cycle Enzymes on Metabolism and  
660 Virulence of *Salmonella enterica* serovar Typhimurium. Front Microbiol 10:762.
- 661 42. Kröger C, Colgan A, Srikumar S, Händler K, Sivasankaran SK, Hammarlöf DL,  
662 Canals R, Grissom JE, Conway T, Hokamp K, Hinton JCD. 2013. An infection-  
663 relevant transcriptomic compendium for *Salmonella enterica* serovar Typhimurium.  
664 Cell Host and Microbe 14:683-695.
- 665 43. Shen S, Fang FC. 2012. Integrated stress responses in *Salmonella*. Int J Food  
666 Microbiol 152:75-81.
- 667 44. Neidhardt FC, Bloch PL, Smith DF. 1974. Culture medium for enterobacteria. J  
668 Bacteriol 119:736-47.
- 669 45. Popp J, Noster J, Busch K, Kehl A, Zur Hellen G, Hensel M. 2015. Role of host cell-  
670 derived amino acids in nutrition of intracellular *Salmonella enterica*. Infect Immun  
671 83:4466-75.
- 672 46. Boulos L, Prévost M, Barbeau B, Coallier J, Desjardins R. 1999. LIVE/DEAD®  
673 BacLight™: application of a new rapid staining method for direct enumeration of  
674 viable and total bacteria in drinking water. Journal of Microbiological Methods 37:77-  
675 86.
- 676 47. Ezraty B, Gennaris A, Barras F, Collet JF. 2017. Oxidative stress, protein damage and  
677 repair in bacteria. Nat Rev Microbiol 15:385-396.
- 678 48. Slauch JM. 2011. How does the oxidative burst of macrophages kill bacteria? Still an  
679 open question. Mol Microbiol 80:580-3.
- 680 49. Kitzler J, Fridovich I. 1986. Effects of salts on the lethality of paraquat. Journal of  
681 Bacteriology 167:346-349.
- 682 50. Noster J, Chao TC, Sander N, Schulte M, Reuter T, Hansmeier N, Hensel M. 2019.  
683 Proteomics of intracellular *Salmonella enterica* reveals roles of *Salmonella*  
684 pathogenicity island 2 in metabolism and antioxidant defense. PLoS Pathog  
685 15:e1007741.
- 686 51. Jennewein J, Matuszak J, Walter S, Felmy B, Gendera K, Schatz V, Nowotny M,  
687 Liebsch G, Hensel M, Hardt WD, Gerlach RG, Jantsch J. 2015. Low-oxygen tensions  
688 found in *Salmonella*-infected gut tissue boost *Salmonella* replication in macrophages  
689 by impairing antimicrobial activity and augmenting *Salmonella* virulence. Cell  
690 Microbiol 17:1833-47.
- 691 52. Schulte M, Sterzenbach T, Miskiewicz K, Elpers L, Hensel M, Hansmeier N. 2019. A  
692 versatile remote control system for functional expression of bacterial virulence genes  
693 based on the *tetA* promoter. Int J Med Microbiol 309:54-65.

12.09.2020

Intracellular *Salmonella* ultrastructural heterogeneity

- 694 53. Liss V, Hensel M. 2015. Sample Preparation for Correlative Light and Electron  
695 Microscopy (CLEM) Analyses in Cellular Microbiology. Bio-Protocol 5.  
696 54. Coohill TP, Sagripanti JL. 2008. Overview of the inactivation by 254 nm ultraviolet  
697 radiation of bacteria with particular relevance to biodefense. Photochemistry and  
698 Photobiology 84:1084-1090.  
699 55. Kim JS, Chowdhury N, Yamasaki R, Wood TK. 2018. Viable but non-culturable and  
700 persistence describe the same bacterial stress state. Environ Microbiol 20:2038-2048.  
701 56. McGuffee SR, Elcock AH. 2010. Diffusion, crowding & protein stability in a dynamic  
702 molecular model of the bacterial cytoplasm. PLoS Comput Biol 6:e1000694.  
703 57. Vendeville A, Larivière D, Fourmentin E. 2011. An inventory of the bacterial  
704 macromolecular components and their spatial organization, vol 35, p 395-414.  
705 58. Konopka MC, Shkel IA, Cayley S, Record MT, Weisshaar JC. 2006. Crowding and  
706 confinement effects on protein diffusion *in vivo*. J Bacteriol 188:6115-23.  
707 59. Mika JT, van den Bogaart G, Veenhoff L, Krasnikov V, Poolman B. 2010. Molecular  
708 sieving properties of the cytoplasm of *Escherichia coli* and consequences of osmotic  
709 stress. Mol Microbiol 77:200-7.  
710 60. Penrod JT, Roth JR. 2006. Conserving a volatile metabolite: a role for carboxysome-  
711 like organelles in *Salmonella enterica*. J Bacteriol 188:2865-74.  
712 61. Dalebroux ZD, Edrozo MB, Pfuetzner RA, Ressler S, Kulasekara BR, Blanc MP, Miller  
713 SI. 2015. Delivery of cardiolipins to the *Salmonella* outer membrane is necessary for  
714 survival within host tissues and virulence. Cell Host and Microbe 17:441-451.  
715 62. Romantsov T, Guan Z, Wood JM. 2009. Cardiolipin and the osmotic stress responses  
716 of bacteria. Biochimica et Biophysica Acta (BBA) - Biomembranes 1788:2092-2100.  
717 63. Seydlová G, Fišer R, Čabala R, Kozlík P, Svobodová J, Pátek M. 2013. Surfactin  
718 production enhances the level of cardiolipin in the cytoplasmic membrane of *Bacillus*  
719 *subtilis*. Biochimica et Biophysica Acta - Biomembranes 1828:2370-2378.  
720 64. Dalebroux ZD, Matamouros S, Whittington D, Bishop RE, Miller SI. 2014. PhoPQ  
721 regulates acidic glycerophospholipid content of the *Salmonella Typhimurium* outer  
722 membrane. Proceedings of the National Academy of Sciences 111:1963-1968.  
723 65. Dong H, Zhang Z, Tang X, Huang S, Li H, Peng B, Dong C. 2016. Structural insights  
724 into cardiolipin transfer from the inner membrane to the outer membrane by PbgA in  
725 Gram-negative bacteria. Scientific Reports 6:1-10.  
726 66. Deatherage BL, Cookson BT. 2012. Membrane vesicle release in bacteria, eukaryotes,  
727 and archaea: a conserved yet underappreciated aspect of microbial life. Infect Immun  
728 80:1948-57.  
729 67. Lopez-Amoros R, Castel S, Comas-Riu J, Vives-Rego J. 1997. Assessment of *E. coli*  
730 and *Salmonella* viability and starvation by confocal laser microscopy and flow  
731 cytometry using rhodamine 123, DiBAC4(3), propidium iodide, and CTC. Cytometry  
732 29:298-305.

733

12.09.2020

Intracellular *Salmonella* ultrastructural heterogeneity

## 734 **Figure Legends**

735 **Figure 1: Environmental stress affects STM ultrastructure.** **A-D)** Energy-filtered TEM  
736 (EF-TEM) micrographs (120 keV) showing electron-lucent STM WT after growth in PCN  
737 medium (**A**), PCN medium supplemented with AA (**B**), and electron-lucent (asterisks) and  
738 electron-dense (arrowheads) STM WT in LB medium subcultured for 3.5 h (**C, D**). Arrows  
739 indicate cells undergoing division. **E)** Comparison of STM WT densities in LB medium  
740 shown as mean  $\pm$  SD of different values between bacterial cytoplasm mean grey values  
741 (MGV) and background MGV (see Fig. S1A, B, pooled data). **F)** Comparison of density ratio:  
742 electron-dense (arrowheads in **C, D, I, J**) vs. electron-lucent (asterisks in **C, D, H**) STM WT  
743 and  $\Delta sodAB$  cultured in LB medium without or after PQ treatment. Numbers of cells  
744 quantified: 30, 22, 32, and 33, for STM WT,  $\Delta sodAB$  0  $\mu$ M PQ,  $\Delta sodAB$  1  $\mu$ M PQ, and  
745  $\Delta sodAB$  5  $\mu$ M PQ, respectively. **G-K)** TEM micrographs showing STM  $\Delta sodAB$  without (**G,**  
746 **H**), or after treatment with PQ at 1  $\mu$ M (**I**), or 5  $\mu$ M (**J, K**). **L)** Comparison of the relative  
747 numbers of STM  $\Delta sodAB$  ED. Numbers of cells quantified: 211, 157, and 135, for 0  $\mu$ M, 1  
748  $\mu$ M, and 5  $\mu$ M PQ, respectively. Scale bars, 500 nm. Statistical analysis was accomplished by  
749 Student's *t*-test and significance levels are indicated as follows: \*,  $p < 0.05$ ; \*\*,  $p < 0.01$ ; \*\*\*,  
750  $p < 0.001$ ; n.s., not significant.

751

752 **Figure 2: STM  $\Delta sodAB$  has growth defects and exhibits membrane abnormalities.** **A, B)**  
753 Growth of STM WT (**A**) and STM  $\Delta sodAB$  (**B**) on agar plates. **C-H)** PI staining of STM  
754  $\Delta sodAB$  cultured for 3.5 h in LB medium without treatment (**C**), after treatment with 1  $\mu$ M  
755 PQ (**D, E**), or 5  $\mu$ M PQ (**F, G**) prior to TEM. **D** and **F** show bacteria with PI addition at time  
756 0 h after PQ treatment, while **E** and **G** show cells with PI addition 12 h after PQ treatment. **H)**  
757 Quantification of PI-positive STM  $\Delta sodAB$  cells. The line in **H** represents the level of PI-  
758 positive cells in untreated sample (related to Fig. S2). Number or quantified cells: 13,468,

12.09.2020

Intracellular *Salmonella* ultrastructural heterogeneity

759 1,565, 6,162, and 2,133, for 1  $\mu$ M PQ at 0 h, 1  $\mu$ M PQ at 12 h, 5  $\mu$ M PQ at 0 h, and 5  $\mu$ M PQ  
760 at 12 h, respectively. **I**) Relative numbers of STM  $\Delta$ sodAB with cell envelope invaginations  
761 (arrowheads in **J-L**) of untreated control (**J, M**), or treated with 1  $\mu$ M (**K**) or 5  $\mu$ M PQ (**L, N,**  
762 **O**). **J-O**) TEM analysis by 120 keV EF-TEM of STM  $\Delta$ sodAB shown in **C, D, F**, fixed at 0 h  
763 post PQ treatment. Numbers of cells quantified: 113, 93, and 98, for 0  $\mu$ M, 1  $\mu$ M, and 5  $\mu$ M  
764 PQ, respectively. **N, O**) STM  $\Delta$ sodAB treated with 5  $\mu$ M PQ shows membrane ruptures and  
765 lysis spot (asterisks). Scale bars, 10  $\mu$ m (**C-G**), 1  $\mu$ m (**J-L**), 200 nm (**M-O**).

766

767 **Figure 3: STM WT shows ED cells after PQ treatment in PCN pH 7.4 medium**  
768 **supplemented with AA. A, B**) TEM micrograph of STM WT cultured in PCN medium, pH  
769 7.4 for 3.5 h and shifted to fresh PCN medium, pH 7.4 for incubation without (control **A**) or  
770 with 1 mM PQ (**B**). **C-F**) Electron micrograph of STM WT cultured in PCN medium pH 7.4  
771 (**C and D**), or pH 5.8 (**E and F**) supplemented with AA for 3.5 h and shifted to the same fresh  
772 PCN medium for incubation without (control **C and E**), or with 1 mM PQ (**D and F**). Scale  
773 bars, 1  $\mu$ m. **G**) CFU counts obtained for STM WT without or with addition of 1 mM PQ.  
774 STM was subcultured for 3.5 h in PCN with or without AA supplementation, at pH 7.4 or pH  
775 5.8.

776

777 **Figure 4: Ultrastructural diversity of intracellular STM WT.** STM WT was subcultured  
778 in LB for 3.5 h and used to infect HeLa cells. Infected cells were fixed 16 h p.i. and analyzed  
779 by EF-TEM (120 keV). Micrographs show electron-dense (**A**) and electron-lucent STM WT  
780 (**B, C**). Dividing STM WT cells shown in **C**. Dashed boxes indicate areas enlarged in **a**. Scale  
781 bars, 1  $\mu$ m.

782

12.09.2020

Intracellular *Salmonella* ultrastructural heterogeneity

783 **Figure 5: Hyper-replicating intracellular STM WT forms subpopulations of**  
784 **metabolically active and inactive bacteria.** STM WT harboring dual-color vitality reporter  
785 was visualized inside HeLa LAMP1-GFP cells 8 h and 16 h p.i. *Gfp* was constitutively  
786 expressed in STM WT, while *dsred* expression was induced by addition of AHT 2 h prior to  
787 imaging. **A)** DsRed is visible in all intracellular STM WT associated with SIF formation 8 h  
788 p.i. (yellow cells in merge, red arrows). **B)** At 16 h p.i., hyper-replicating intracellular STM  
789 WT either lack DsRed (inactive cell indicated by green arrows) or are DsRed-positive (active  
790 cells indicated by red arrows). Scale bars, 20 and 5  $\mu\text{m}$  in overview and detail, respectively.

791

792 **Figure 6: CLEM reveals ultrastructural and metabolic diversities of hyper-replicating**  
793 **intracellular STM WT in HeLa cells.** HeLa cells seeded on gridded cover slip were infected  
794 with STM WT harboring the dual-color vitality reporter and visualized 16 h p.i. *Gfp* was  
795 constitutively expressed in STM WT while *dsred* expression was induced by AHT 2 h prior to  
796 imaging by confocal FM. Subsequently, cells were processed for TEM. **A)** Representative  
797 HeLa cell with hyper-replicating intracellular STM WT, either DsRed-positive (active cells)  
798 or DsRed-negative (inactive). **B)** Representative HeLa cell with replicating STM WT, which  
799 are DsRed-positive. For CLEM, EF-TEM micrographs of 200 nm thick sections of infected  
800 HeLa cells obtained at 120 keV were correlated with GFP or DsRed fluorescence signals of  
801 confocal sections after deconvolution. **a-d)** High-resolution CLEM of ROIs (white boxes)  
802 harboring intracellular STM WT of diverse electron density (TEM) and activity levels  
803 (DsRed, FM). Note ED and EL STM during division (**Ac**), which are DsRed-negative. ‘Wide’  
804 (w) and ‘thin’ (t) STM are marked. Scale bars, 10  $\mu\text{m}$  (**A**, all overviews and **B**, LM  
805 overviews), 1  $\mu\text{m}$  (**B**, TEM overviews, **Aa-Ad** and **Ba**), 500 nm (**Bb-d**).

806

12.09.2020

Intracellular *Salmonella* ultrastructural heterogeneity

807 **Figure 7: High-resolution CLEM of intracellular STM WT precisely locates proteins in**  
808 **bacterial cytoplasm: halo-like distribution of GFP/DsRed and electron density in single**  
809 **cells.** Intracellular STM WT harboring dual-color vitality reporter was visualized inside HeLa  
810 cells seeded on gridded cover slips 16 h p.i. STM WT constitutively expressed *gfp*, while  
811 *dsred* expression was induced by AHT 2 h prior to imaging by confocal FM. Subsequently,  
812 cells were processed for TEM. **Aa-Ac)** Overview of HeLa cell with hyper-replicating  
813 intracellular STM WT (GFP, green) showing metabolic activity (DsRed, yellow in merge).  
814 Dashed boxes indicate CLEM region in **B** and **C**. **B, C)** CLEM of consecutive 200 nm thick  
815 sections of region with STM WT of halo-like electron density (indicated by arrowheads). GFP  
816 and DsRed confocal fluorescence signals after deconvolution (**d-f**) are correlated with 120  
817 keV EF-TEM micrographs. GFP and DsRed are distributed in a halo-shaped electron density.  
818 Scale bars, 10  $\mu\text{m}$  (**A**), 1  $\mu\text{m}$  (**B, C**).

819

820 **Figure 8: ‘Halo’ type of STM WT dominates in critical environmental conditions.** **A)**  
821 Comparison of relative numbers of halo-shaped STM WT and  $\Delta\text{sodAB}$  cultured in LB  
822 medium overnight (o/n) or further subcultured for 3.5 h in fresh medium prior to TEM  
823 preparation (TEM in Fig. S1D-G). Number of quantified cells: 1,032, 819, 747, and 510, for  
824 WT 3.5 h, WT o/n,  $\Delta\text{sodAB}$  3.5 h, and  $\Delta\text{sodAB}$  o/n, respectively. **B, C)** STM WT was  
825 irradiated 60 sec with UV light (305 nm) prior to TEM preparation. **B)** Comparison of relative  
826 numbers of halo-shaped STM WT after UV irradiation (arrowheads in **C**) to its control, the  
827 same LB culture without UV treatment. Numbers of quantified cells: 716 and 612, for UV-  
828 treated and non-treated groups, respectively. **C)** TEM micrograph of UV-treated STM WT  
829 with halo-shaped profiles (indicated by arrowheads). **D-I)** TEM micrographs of HeLa cells 16  
830 h p.i. with STM WT. Infected HeLa cells containing hyper-replicating STM WT show  
831 disrupted cell membranes and signs of cell death. Nearly all intracellular STM WT have



12.09.2020

Intracellular *Salmonella* ultrastructural heterogeneity

832 cytoplasmic densities distributed as a halo (arrowheads). Scale bars, 2.5  $\mu\text{m}$  (**D, E**), 1  $\mu\text{m}$  (**C,**

833 **F-I**).

834

12.09.2020

Intracellular *Salmonella* ultrastructural heterogeneity

## 835 **Suppl. Figure Legends**

836 **Figure S1 (related to Fig. 1): A-C)** Quantification of data obtained by 120 keV EF-TEM  
837 imaging (related with Fig. 1C-E). **A)** Comparison of electron densities (difference values of  
838 MGV of STM cytoplasm to MGV of background) of ED and EL STM WT in different  
839 regions of sample. Averages of electron densities (**B**), and (**C**) averaged density ratio (mean  $\pm$   
840 SD). **D-M)** Electron micrographs at 50 keV of STM WT and  $\Delta sodAB$  strains from o/n  
841 cultures or 3.5 h subcultures in LB medium (**D-G**), STM WT from o/n or 3.5 h subcultures in  
842 PCN, pH 7.4 with (**J, K**), or without AA supplementation (**H, I**), or in PCN, pH 5.8 (**L, M**).  
843 Arrows indicate cells with mixed electron densities and halo-like distribution in **E**.  
844 Arrowheads in **G** indicate cells of STM  $\Delta sodAB$  with translucent spot not found in 3.5 h  
845 subculture of the same culture. Scale bar, 1  $\mu$ m. Statistical analysis was accomplished by  
846 Student's *t*-test, and significance levels are indicated as follows: \*,  $p < 0.05$ ; \*\*,  $p < 0.01$ ;  
847 \*\*\*,  $p < 0.001$ ; n.s., not significant.

848

849 **Figure S2 (related to Fig. 2): PQ treatments affects membrane integrity to similar**  
850 **extend in STM WT and  $\Delta sodAB$  strains.** **A)** Relative numbers of PI-positive STM  $\Delta sodAB$   
851 without and after treatment with PQ. Obvious increase of PI-load events in culture was  
852 achieved after treatment with 50  $\mu$ M PQ in comparison to control (no treatment) and  
853 treatment with PQ at concentrations of 5  $\mu$ M or 10  $\mu$ M. Number of cells quantified: 3,876,  
854 1,5825, 15,804, and 18,016, for 0  $\mu$ M, 5  $\mu$ M, 10  $\mu$ M, and 50  $\mu$ M PQ, respectively. **B, C)**  
855 Comparison of PQ effects at 50  $\mu$ M PQ between STM WT and  $\Delta sodAB$ : the relative number  
856 of PI-positive cells and fluorescence intensities of PI. PI was loaded 12 h after PQ treatment.  
857 STM  $\Delta sodAB$  shows high variability in number and degree (intensities) of PI-load events in  
858 the culture (controls). Statistical analysis was accomplished by Student's *t*-test and

12.09.2020

Intracellular *Salmonella* ultrastructural heterogeneity

859 significance levels are indicated as follows: \*,  $p < 0.05$ ; \*\*,  $p < 0.01$ ; \*\*\*,  $p < 0.001$ ; n.s., not  
860 significant.

861

862 **Figure S3 (related to Fig. 3): Treatments of STM WT using various stressors have**  
863 **impact on ultrastructure. A-F)** Electron micrograph of STM WT cultured in PCN, pH 7.4  
864 for 3.5 h and shifted to fresh PCN, pH 7.4 (**A-C**), or PCN, pH 5.8 (**D-F**) for incubation  
865 without PQ (control **A, D**), with 100  $\mu\text{M}$  PQ (**B, D**), or 500  $\mu\text{M}$  PQ (**C, F**). **G-L**) EF-TEM  
866 micrographs of STM WT without (control), after 100  $\mu\text{M}$  or 500  $\mu\text{M}$  PQ treatment, displayed  
867 as an electron density scale. Arrowheads point to cells with denser cytoplasm compared to  
868 controls. **M-O**) Electron micrograph of STM WT cultured in PCN, pH 7.4 supplemented with  
869 AA for 3.5 h and shifted to fresh PCN, pH 7.4 for incubation without (control **G**), with 100  
870  $\mu\text{M}$  PQ (**H**), or 500  $\mu\text{M}$  PQ (**I**). **P-S**) Electron micrograph of STM WT cultured in PCN, pH  
871 7.4 or PCN, pH 5.8 supplemented with AA for 3.5 h and shifted to fresh PCN, pH 3.0 for  
872 incubation without (**P** and **R**), or with 1 mM PQ (**Q** and **S**). **T-V**) Electron micrographs of  
873 STM WT cultured in PCN, pH 7.4 for 3.5 h and shifted to fresh PCN, pH 7.4 for incubation at  
874 80 °C (**T**), to PCN, pH 7.4 containing 600 mM NaCl (**U**), or to pure  $\text{H}_2\text{O}_{\text{dd}}$  (**V**). **W**) Aliquots  
875 of STM subcultured for 3.5 h in PCN, pH 7.4 or PCN, pH 5.8 without PQ treatment, or  
876 treatment with 100  $\mu\text{M}$ , 500  $\mu\text{M}$  or 1 mM PQ were plated onto agar plates, and CFU were  
877 determined. CFU per ml culture are expressed as percentage of CFU of untreated culture. **X**,  
878 **Y**) Relative numbers of STM WT with shrinkage (arrowhead in **D**) or features of lysis  
879 (arrowhead in **F**) in indicated culture conditions. Features of untreated control samples in %  
880 of total are shown in **X** and x-fold increase of features of stressor-treated samples compared to  
881 the respective untreated sample is shown in **Y**. In addition, values of shrinkage and lysis of  
882 stress-treated samples in % of the total population is indicated above. Quantified cells for  
883 each condition: 100-300 cells. Scale bars, 1  $\mu\text{m}$  (**A-V**), 250 nm (detail in **C-F**).

12.09.2020

Intracellular *Salmonella* ultrastructural heterogeneity

884

885 **Figure S4 (related to Fig. 5-7): Functional characterization of dual-color vitality**  
886 **reporter of STM WT. A)** The dual-color vitality reporter harbors a constitutive *gfp*  
887 expression and an AHT-inducible expression of *dsred*. Metabolically active bacteria are  
888 expected to synthesize DsRed after the addition of AHT, in contrast to metabolically inactive  
889 bacteria, or when protein biosynthesis is experimentally blocked by chloramphenicol (Cm)  
890 after induction. **B)** Cytometric gating shows detection of bacteria-sized particles selected by  
891 FSC/SSC. GFP-positive cells were gated, the DsRed fluorescence intensity of the GFP-  
892 positive bacterial population was determined, and the x-median RFI of the entire population  
893 was calculated. **C)** Comparison of relative DsRed-positive numbers of STM WT subcultures  
894 without AHT induction, with AHT induction or AHT induction/Cm inhibition. DsRed-  
895 positive counts achieve a maximum already 1 h after addition of AHT. Cm inhibits synthesis  
896 of DsRed after AHT induction. The x-median represents the AHT-induced DsRed signal of  
897 the GFP-positive bacterial population. **D)** DsRed intensity peaks at 0 h (black), 3 h (red, start  
898 of AHT induction), or 7 h (green) of subculture. DsRed intensity shifts towards higher values  
899 after addition of AHT (upper histograms). If no AHT is added (middle histograms), or protein  
900 biosynthesis is blocked by addition of Cm (lower histograms), DsRed intensity remains low.  
901 **E)** Intracellular STM WT with dual-color vitality reporter (GFP) in infected HeLa cells were  
902 DsRed positive (yellow in merge) only after addition of AHT. Addition of Cm with AHT  
903 successfully blocks DsRed synthesis. Scale bar, 5  $\mu$ m.

904

905 **Figure S5 (related with Fig. 6 and 7): CLEM approach to analyze intracellular STM at**  
906 **high resolution. A)** To register coordinates for CLEM, HeLa cells were seeded at a gridded  
907 cover slip prior to infection with STM WT harboring the dual-color vitality reporter. *Gfp* was  
908 constitutively expressed in STM WT, while *dsred* expression was induced by addition of

12.09.2020

Intracellular *Salmonella* ultrastructural heterogeneity

909 AHT 2 h prior to imaging of selected ROIs by CLSM at 16 p.i. Subsequently, samples were  
910 fixed and prepared for TEM by flat-embedding in plastic resin. Coordinates from CLSM were  
911 well visible, allowing relocation of ROIs. Resin fragments containing ROIs were dissected  
912 and individually fixed to resin blocks for serial 200 nm ultra-sectioning. After relocation of  
913 HeLa cells containing STM WT in TEM modality, serial sections were acquired at 120 keV  
914 with energy filtering ( $\Omega$  filter). This approach significantly reduced time needed for sample  
915 preparation to image whole cells with TEM, providing the opportunity to collect data of high  
916 quality at optimal resolutions for correlation or TEM analysis. **B)** CLEM imaging steps:  
917 visualization by CLSM of intracellular STM WT by virtue of GFP fluorescence, and  
918 evaluation of metabolic activity by virtue of DsRed intensity (Z-stack through STM  
919 population, maximum intensity projection is shown), registration of positions of infected  
920 HeLa cells using BF-LM, relocalization of HeLa cells in resin using imprinted CLEM  
921 coordinates, TEM imaging, correlation of single CLSM planes with corresponding single  
922 TEM images. **C)** Comparison of fluorescence signals without and with deconvolution using  
923 Huygens software. After deconvolution, location of proteins GFP and DsRed was increased,  
924 and signal-to-noise ratio was improved. Scale bars, 20  $\mu\text{m}$  (**B**, left panel), 5  $\mu\text{m}$  (**B**, right panel  
925 and **C**), 2  $\mu\text{m}$  (**C**, detail).

926

927 **Figure S6 (related with Fig. 8): UV treatment of STM WT boosts ultrastructural**  
928 **diversity. A, B)** Cultures of STM WT grown o/n in LB were irradiated 60 sec. with UV light  
929 (305 nm) prior preparation for TEM. As control, STM WT of the same culture was left  
930 without irradiation and processed in parallel for TEM. Various ultrastructural profiles were  
931 defined: **(I)** EL, **(II)** ED, **(III)** initiated cell death, indicated by shrinkage and damage of inner  
932 membrane, or **(IV)** presence of electron-dense (condensation) and translucent (lysis) spots in  
933 the bacterial cytosol, **(V)** dead cells with condense cytosolic materials and severally

12.09.2020

Intracellular *Salmonella* ultrastructural heterogeneity

934 fragmented or lacking inner membranes, and **(VI)** the halo-shaped profile with electron  
935 densities at peripheries of cytoplasm. **C)** Comparison of relative numbers of profiles **I** to **V** of  
936 UV-irradiated and untreated STM WT. **VI**-type relative number is shown in Fig. 8B. Number  
937 of quantified cells: 716 and 612 for UV-irradiated and non-treated groups, respectively. **D)**  
938 Comparison of accumulated frequency of STM with **I** and **II** profiles (ED+EL), to  
939 accumulated frequency of STM with morphological impairments (**III-V**, shrinkage and lysis  
940 of various severity). **E)** Effect of UV irradiation on bacterial survival. Plating of aliquots of  
941 STM cultures onto agar plates and CFU determination was performed for all experiments  
942 involving UV irradiation. **F)** Flow cytometry analysis of STM WT activity using dual-color  
943 vitality reporter after UV irradiation. Overnight cultures of STM WT were UV-treated or  
944 untreated (control) prior to subculture in fresh LB medium. Induction of *dsred* expression was  
945 initiated by addition of AHT at start of subculture. Cultures were sampled in hourly intervals  
946 with parallel plating onto agar plates for CFU counts. The x-median RFI represents the  
947 AHT-induced DsRed signal of the GFP-positive bacterial population. **G)** Viability of STM  
948 analyzed in **F**. The amount of living bacteria was calculated and normalized to 100% of living  
949 STM in an untreated sample. As control, STM without UV irradiation were used. Note an  
950 increase of DsRed intensity of UV-irradiated bacteria (**F**) in LB medium although their  
951 growth on LB plates is totally inhibited (**G**). Scale bars, 5  $\mu\text{m}$  (**A, B**), 500 nm (**I-VI**).

WT

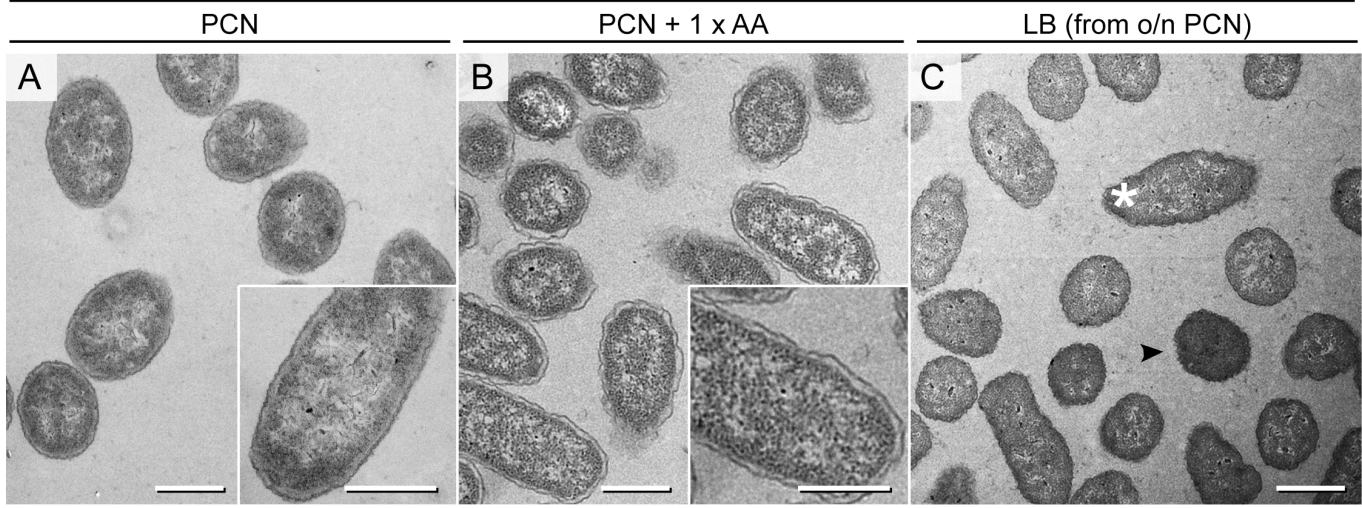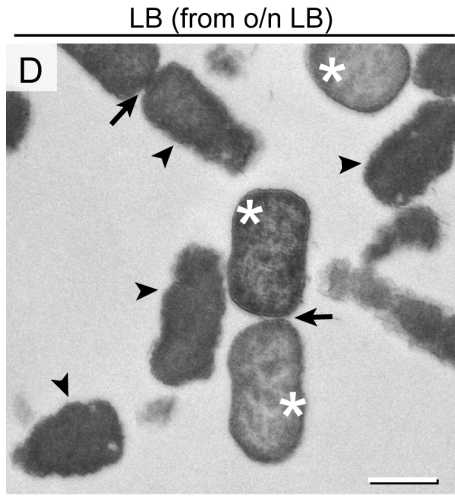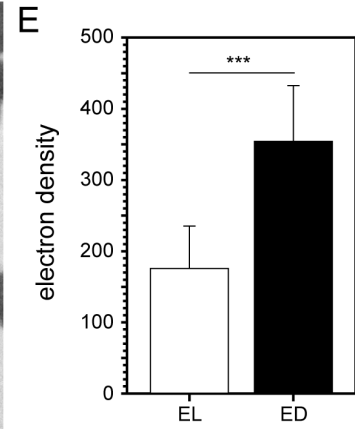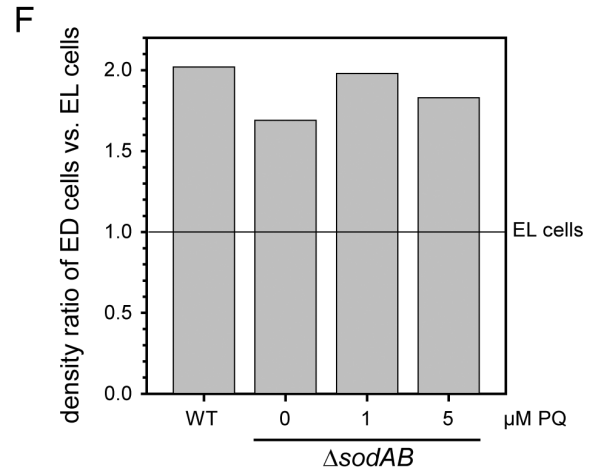

$\Delta$ sodAB

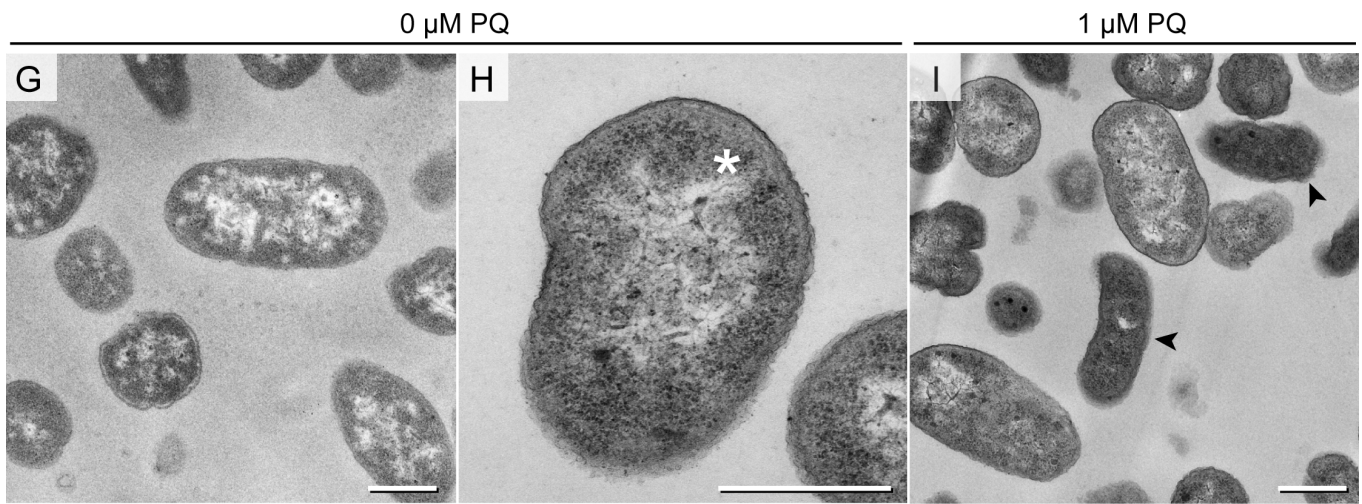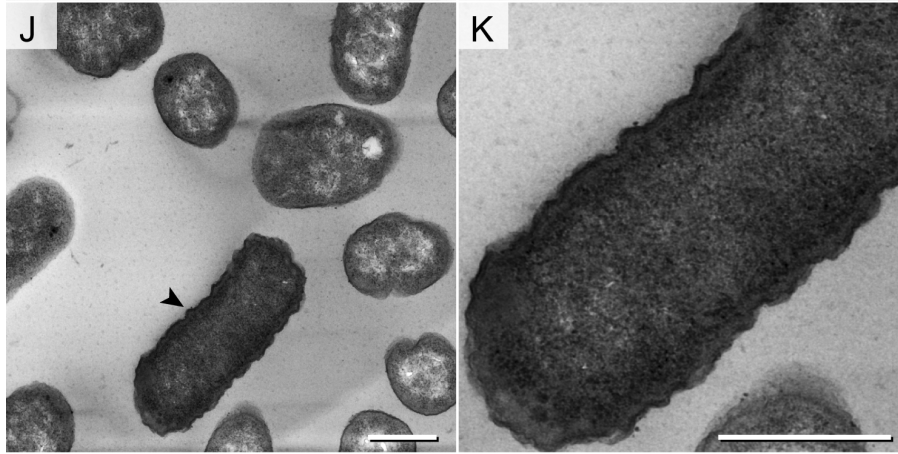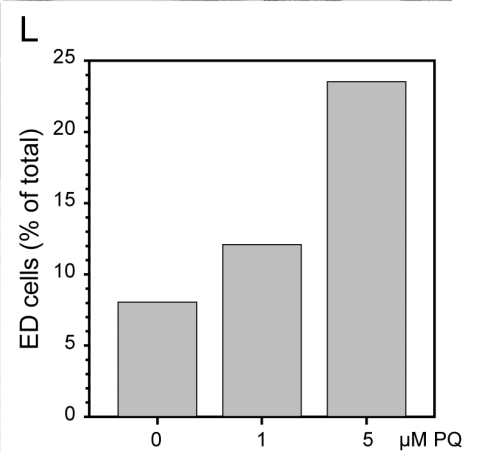

5  $\mu$ M PQ

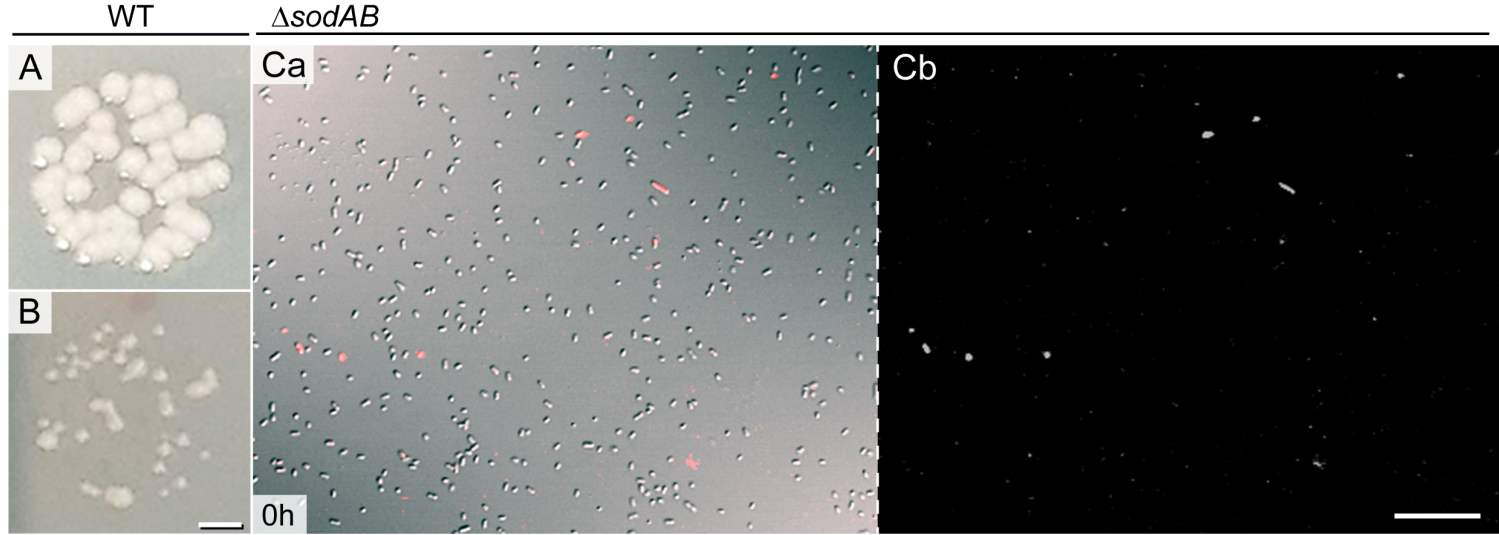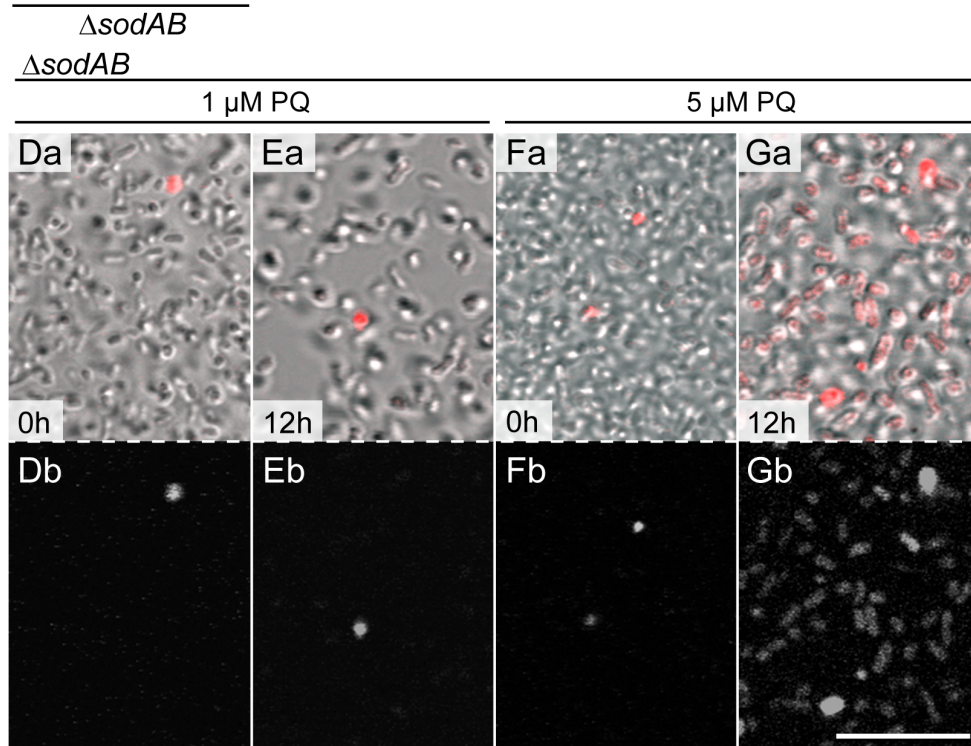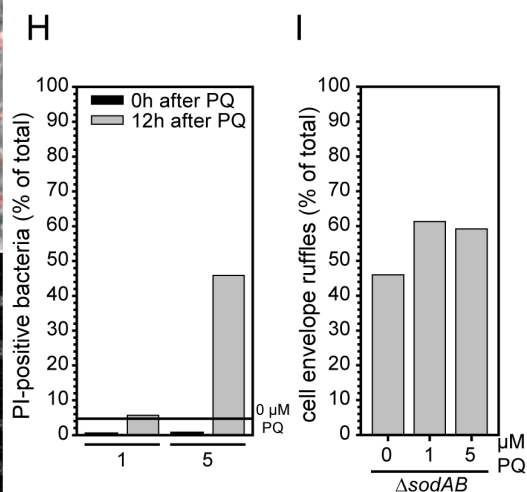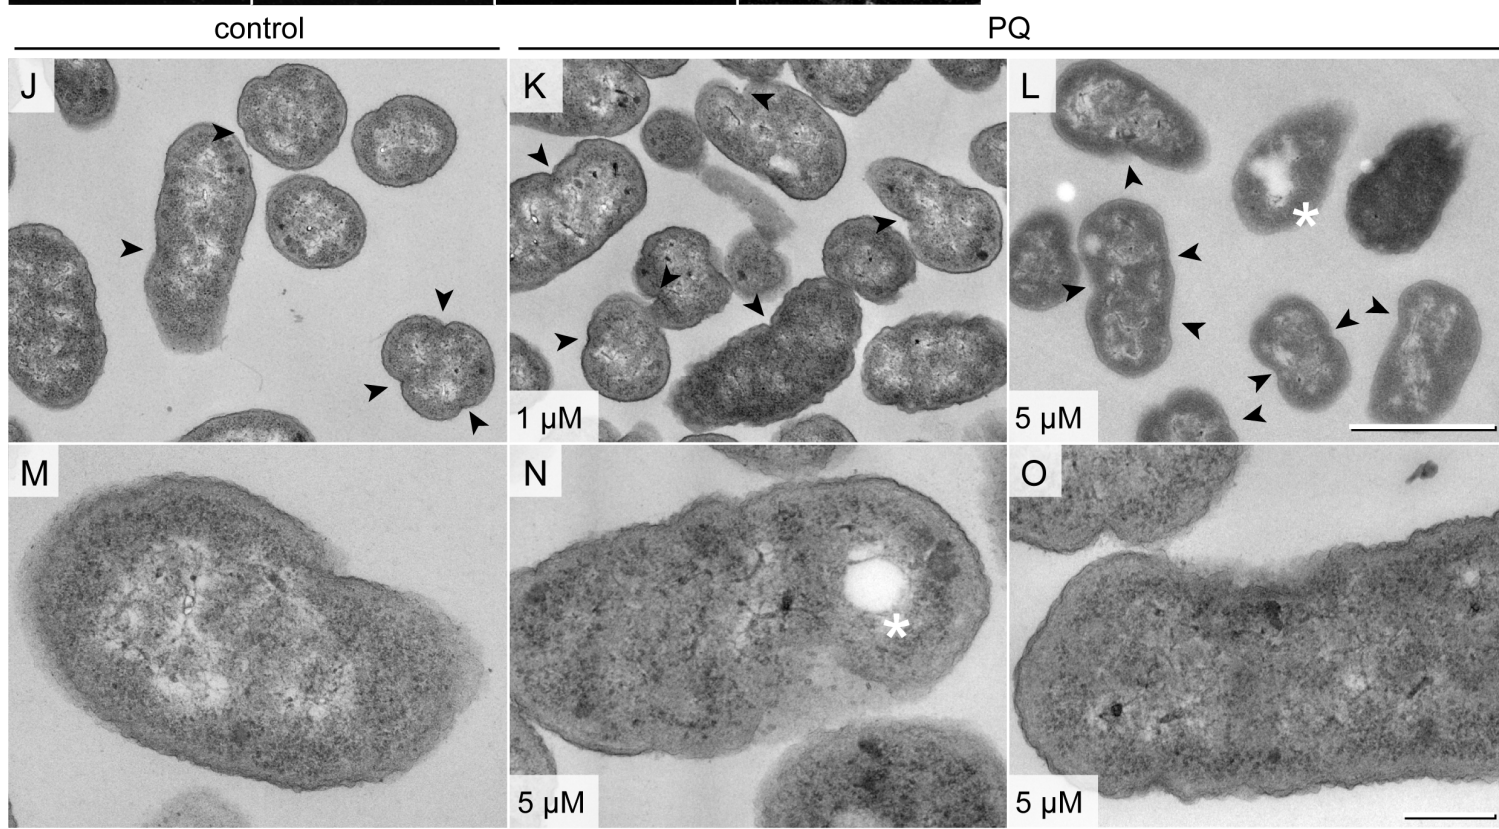



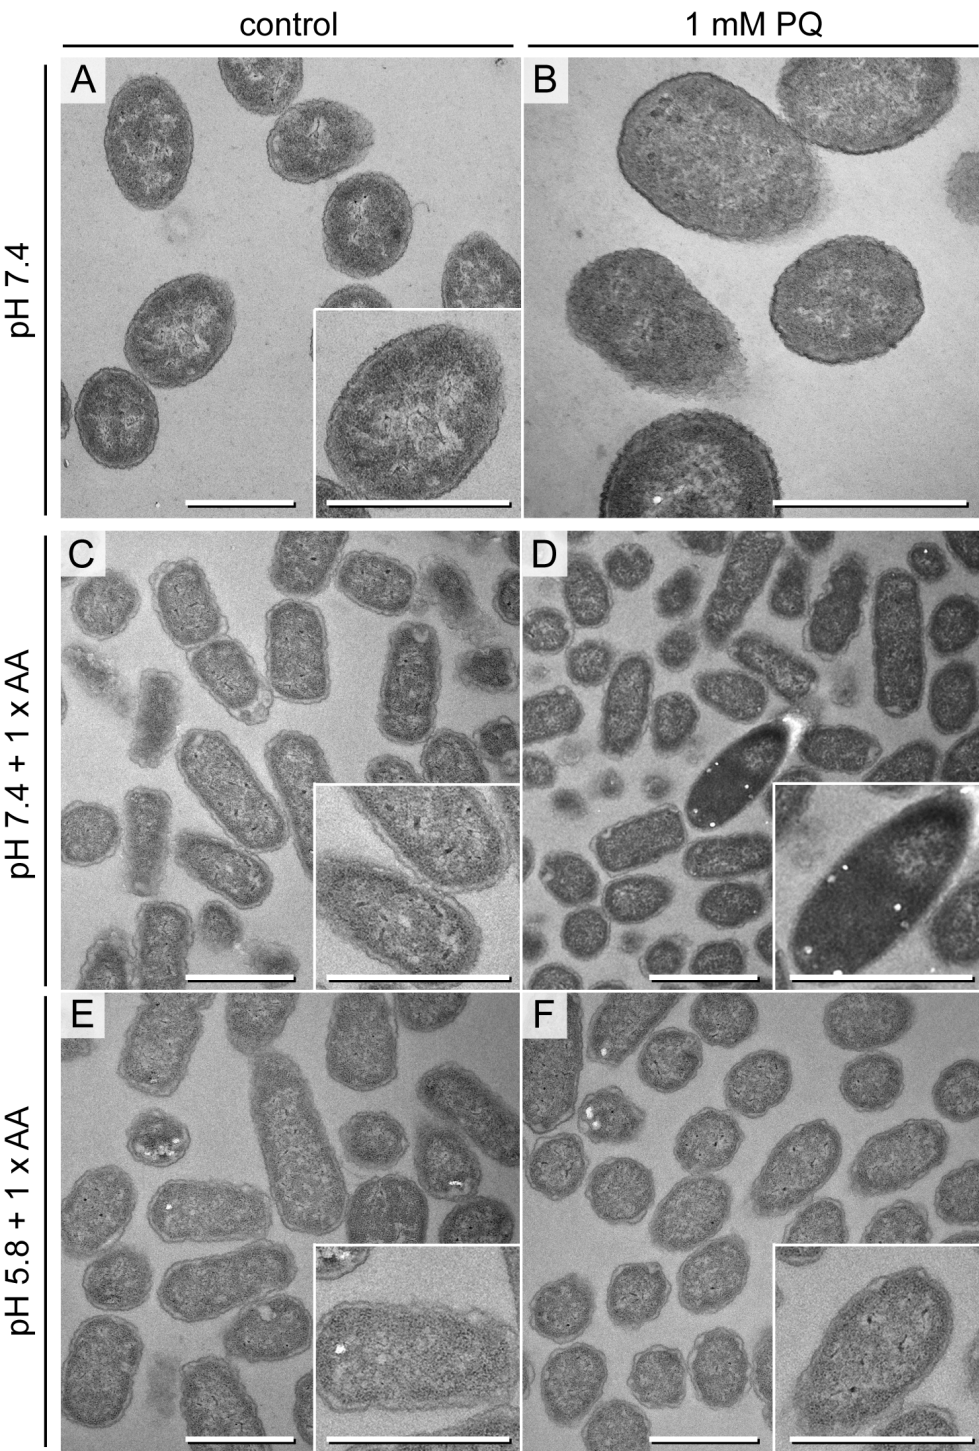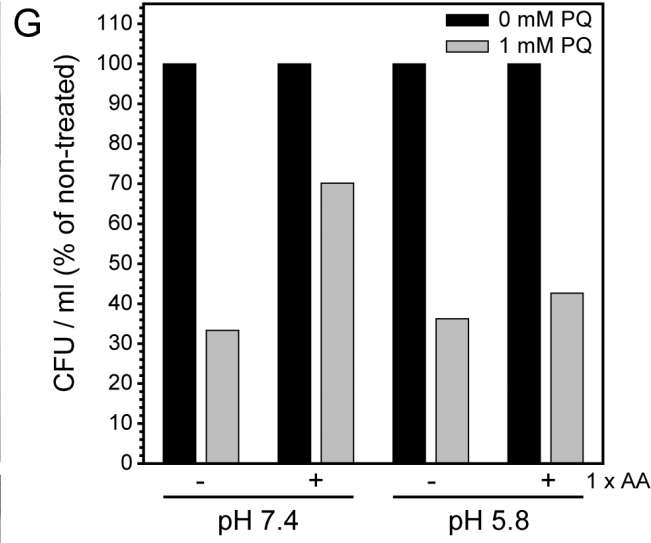

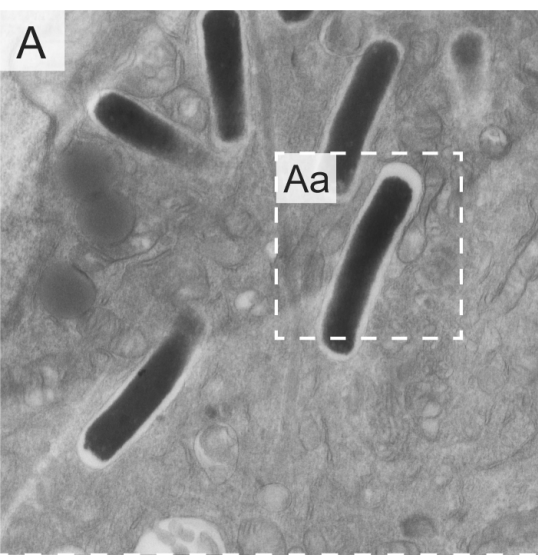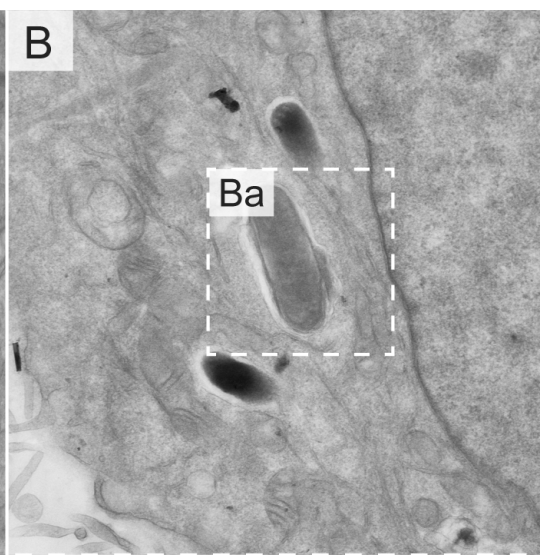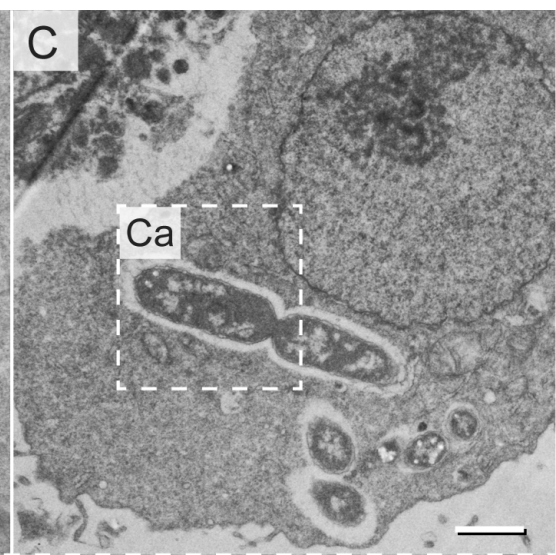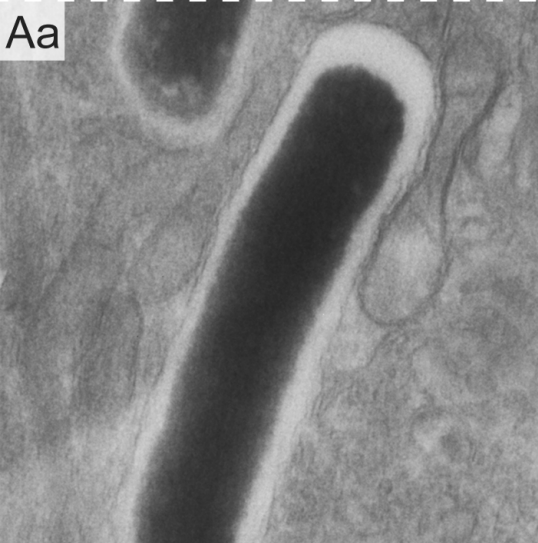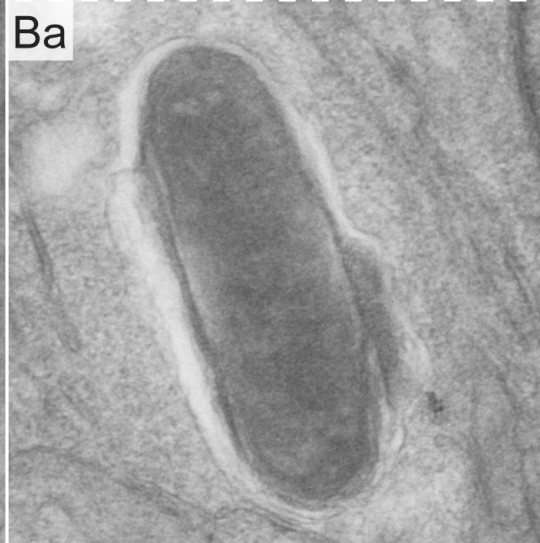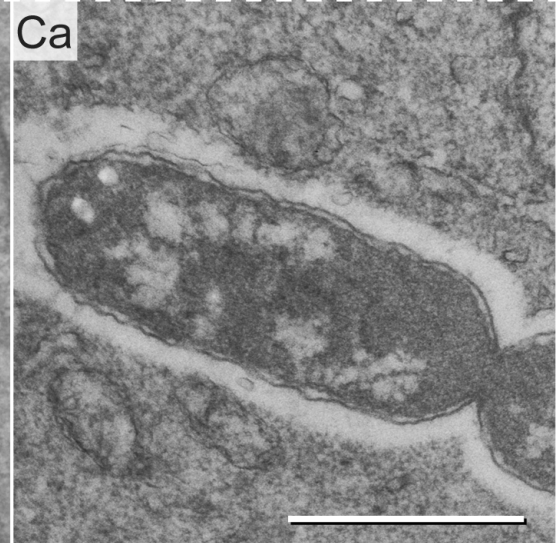

A 8 h p.i.

overview

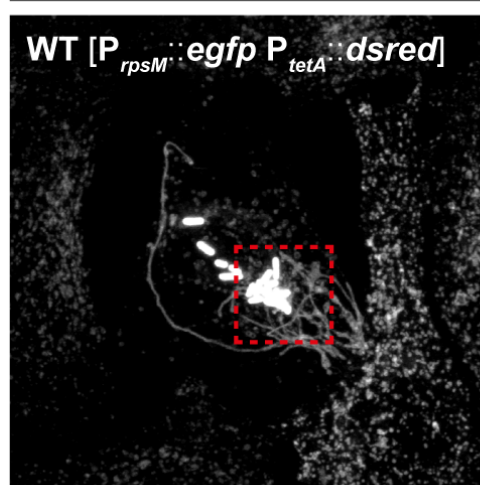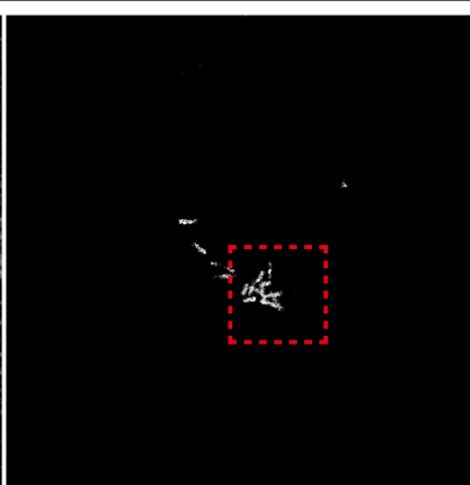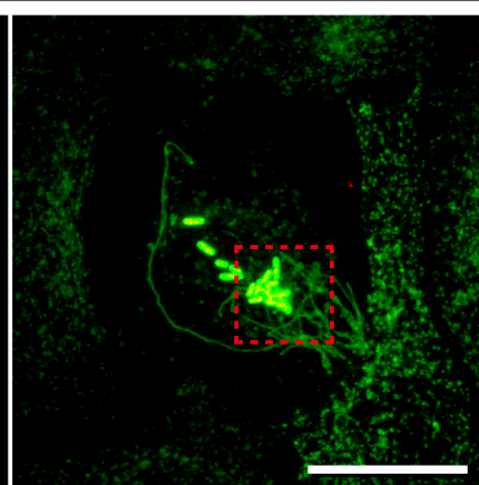

detail

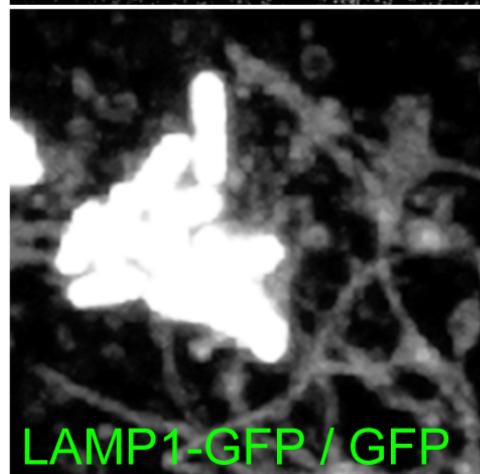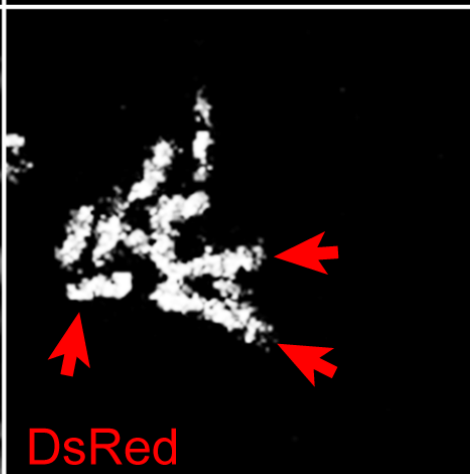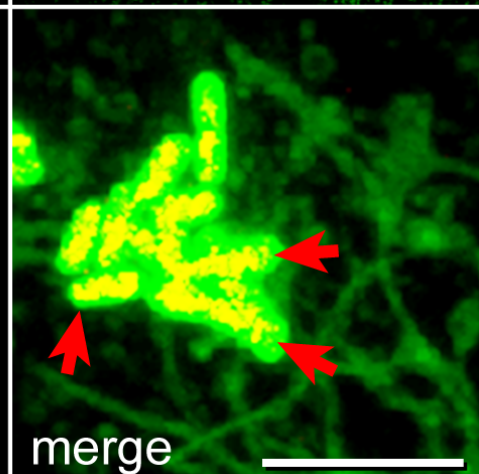

B 16 h p.i.

overview

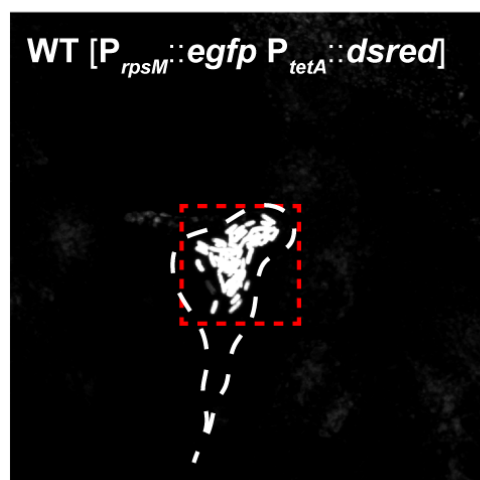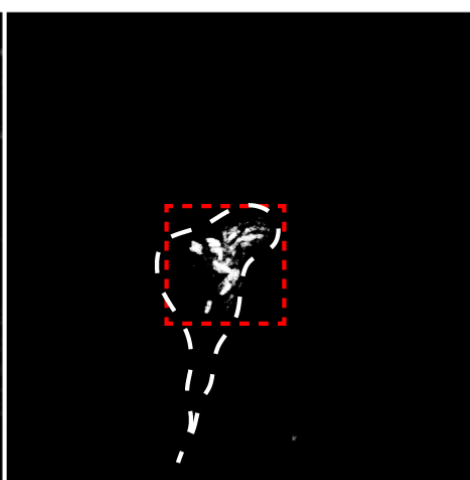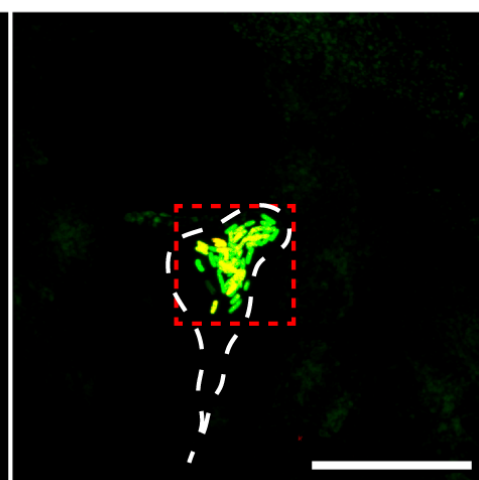

detail

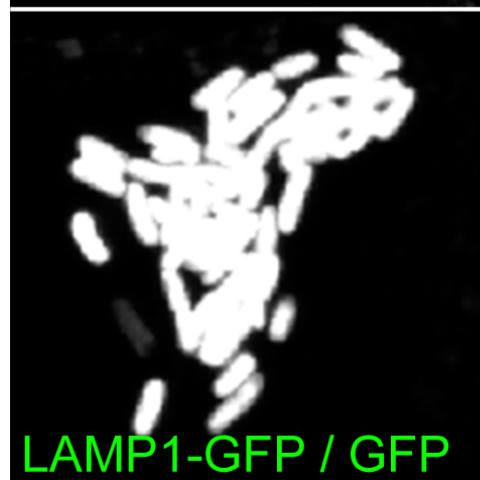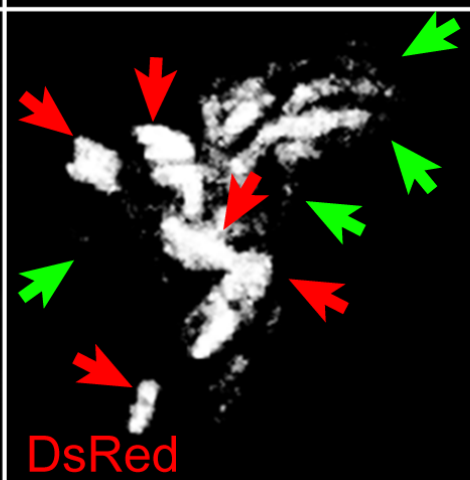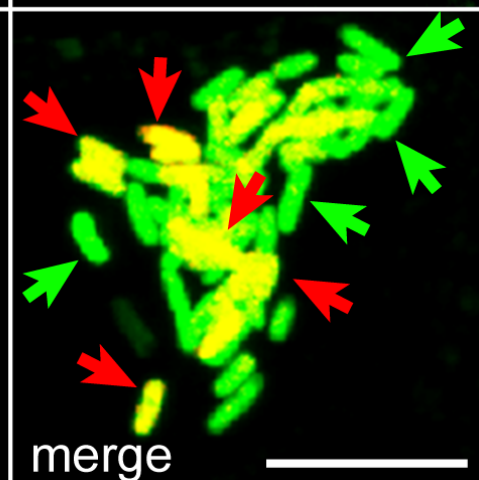

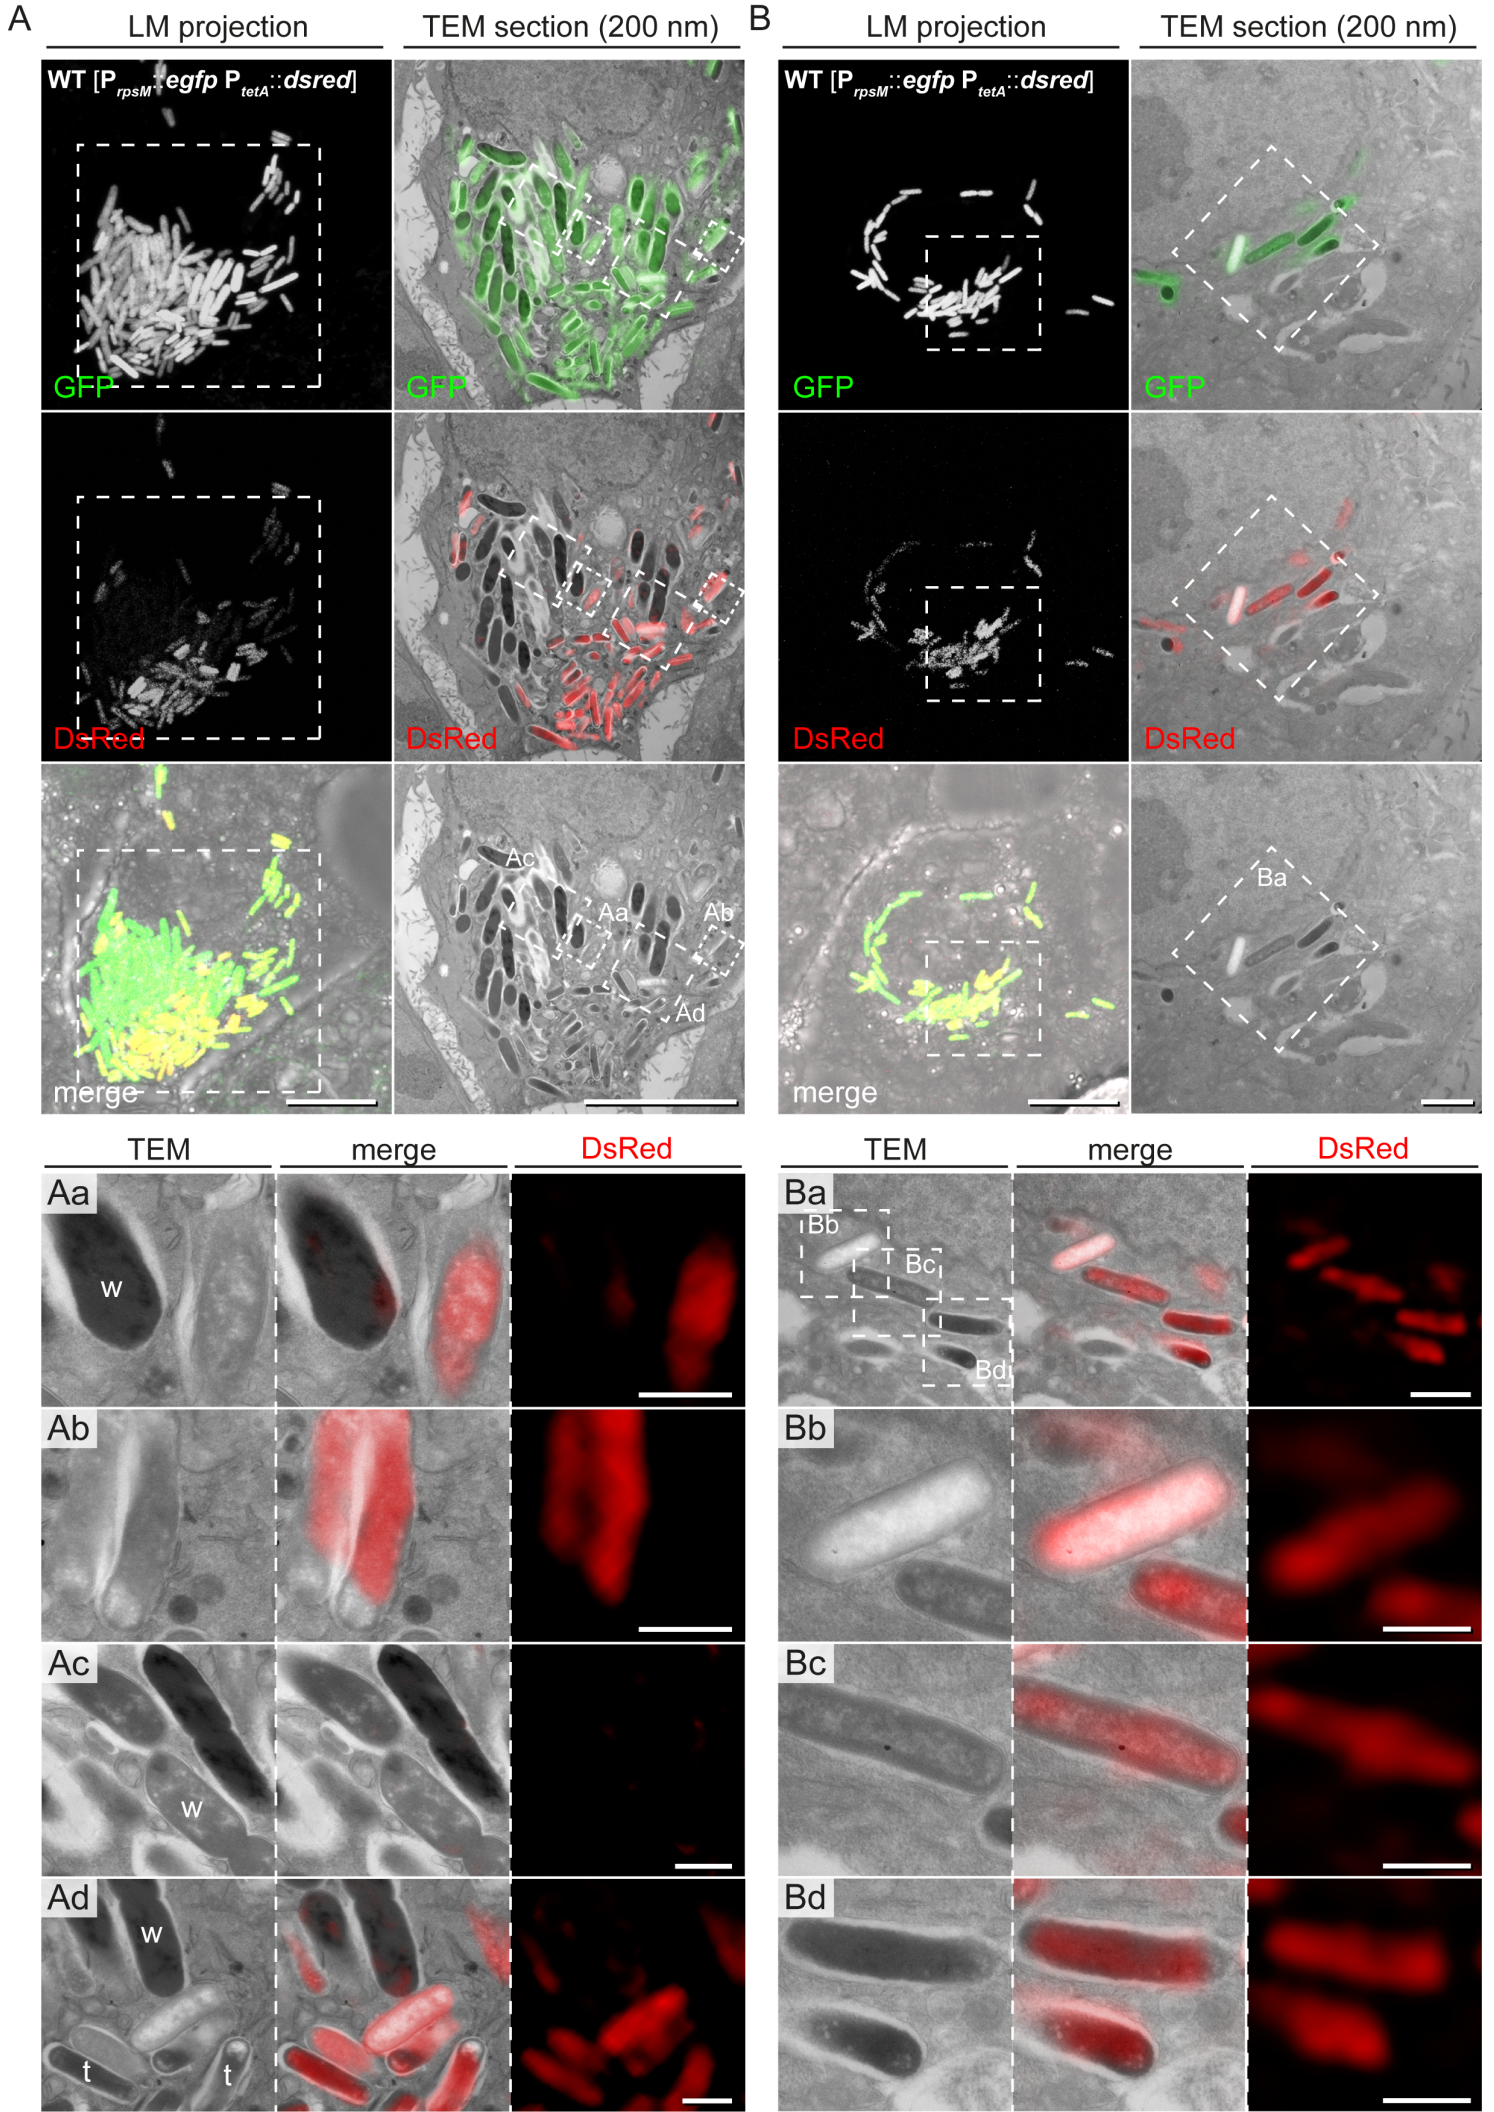

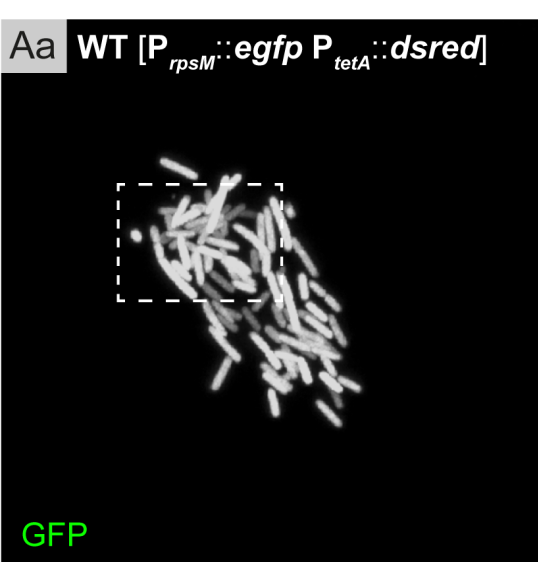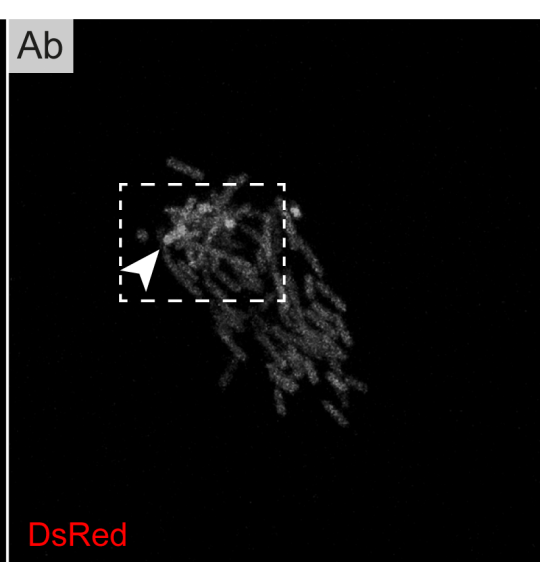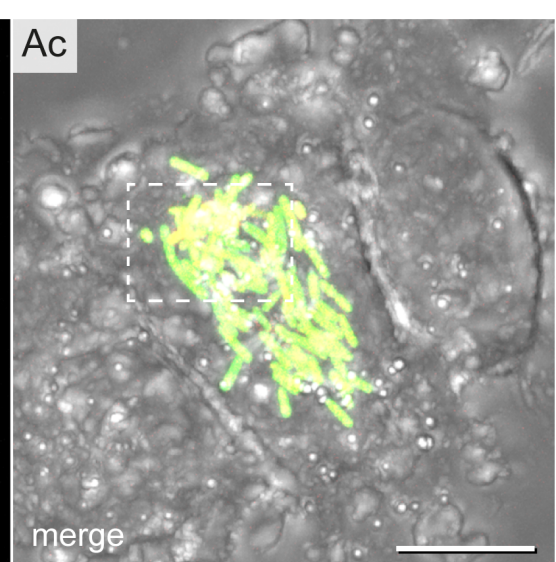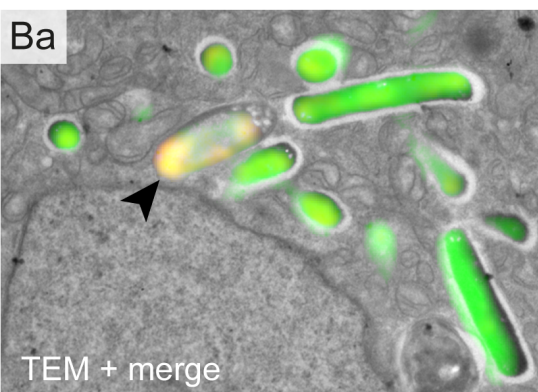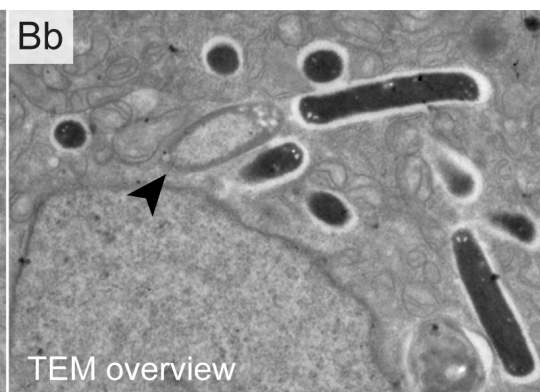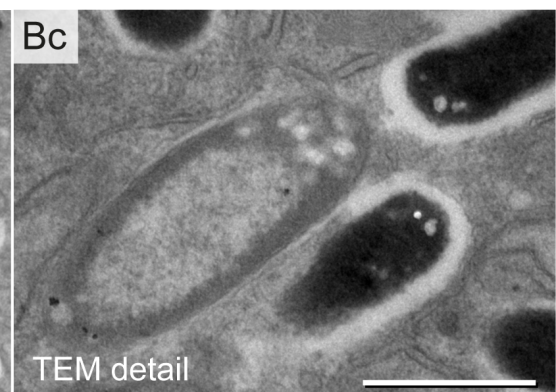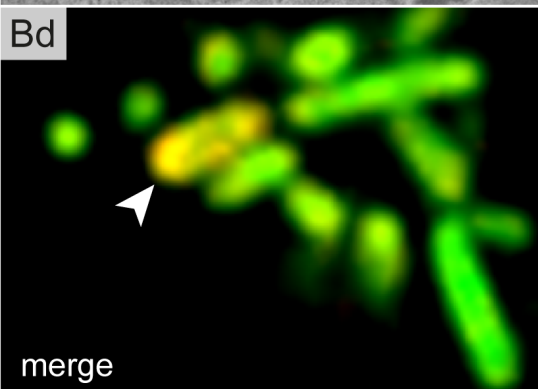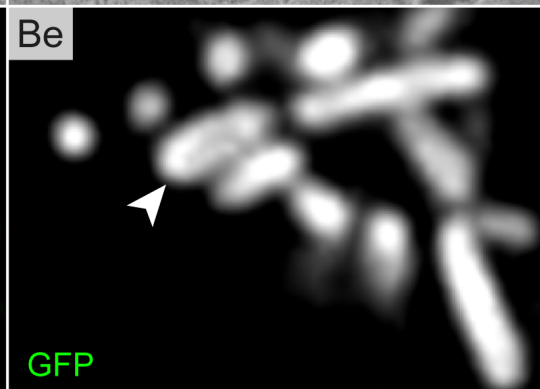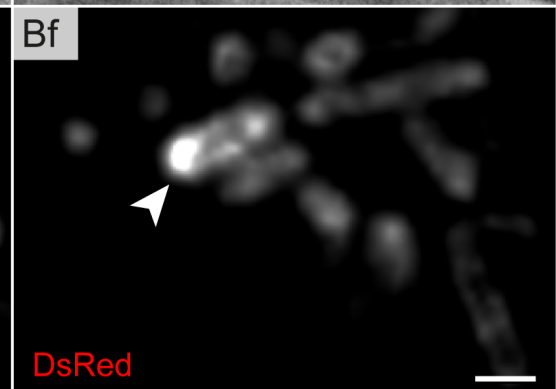

↓ + 200 nm ↓

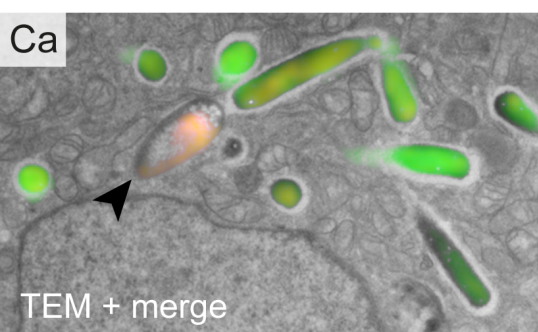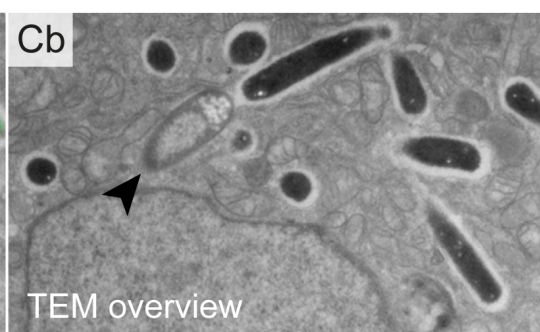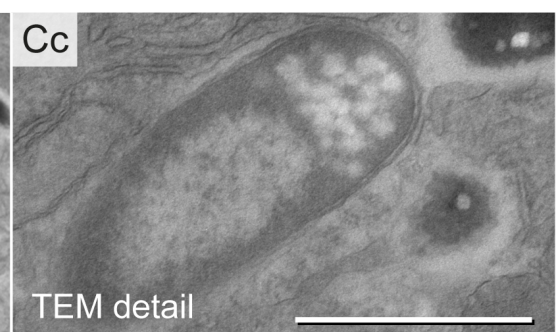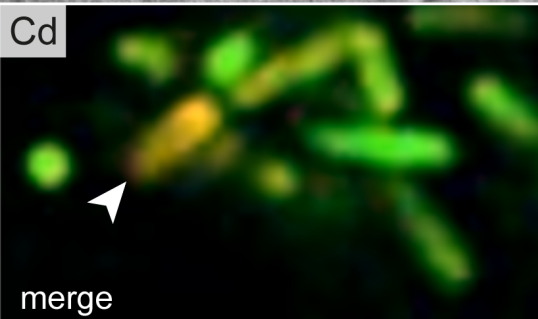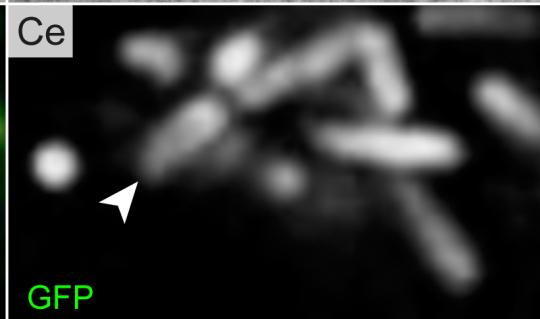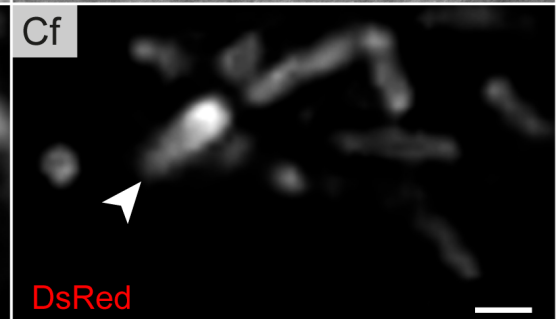

A

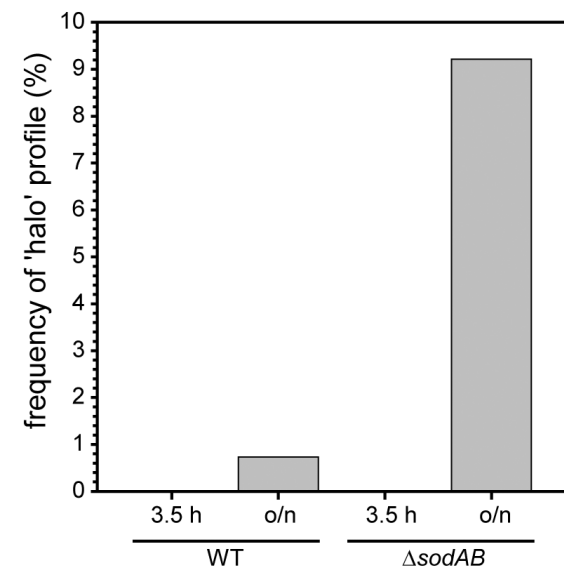

B

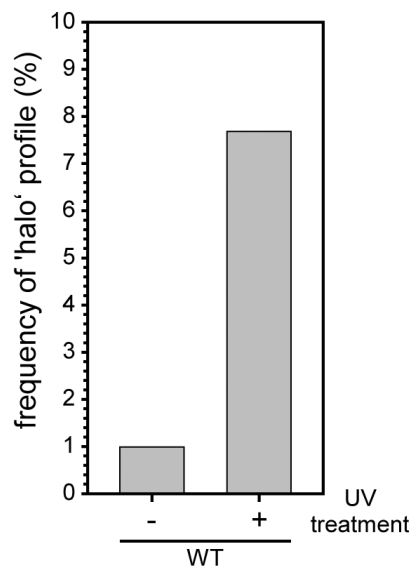

C

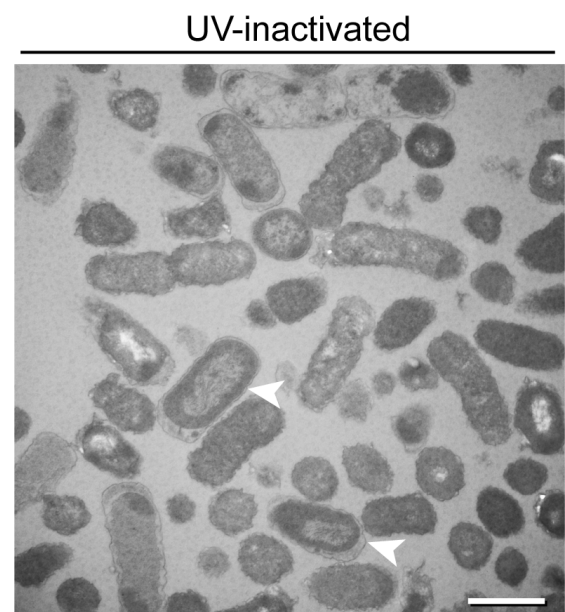

hyper-replicating

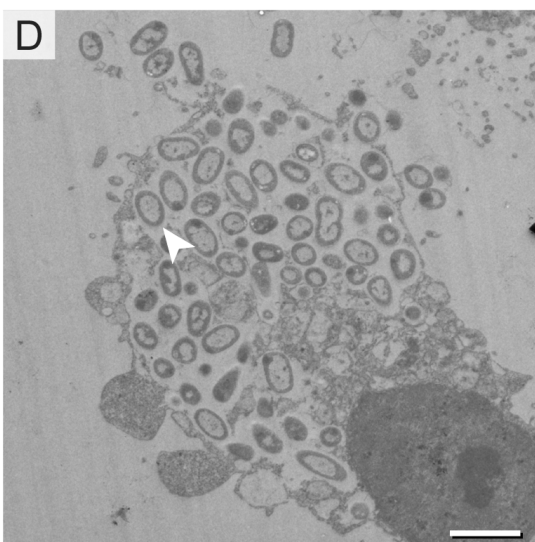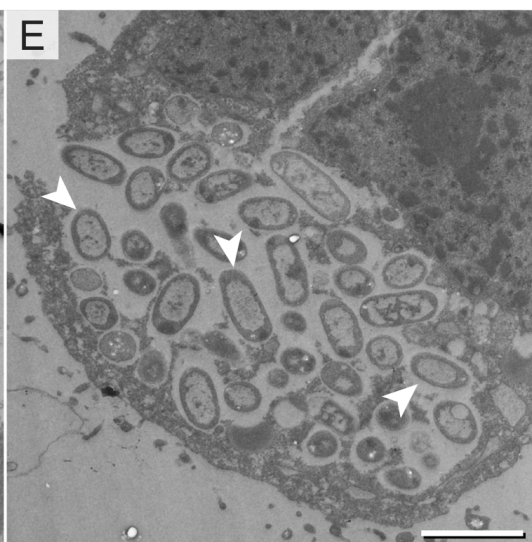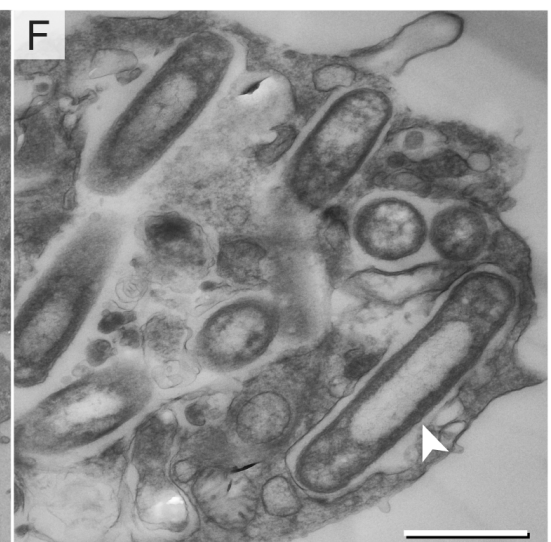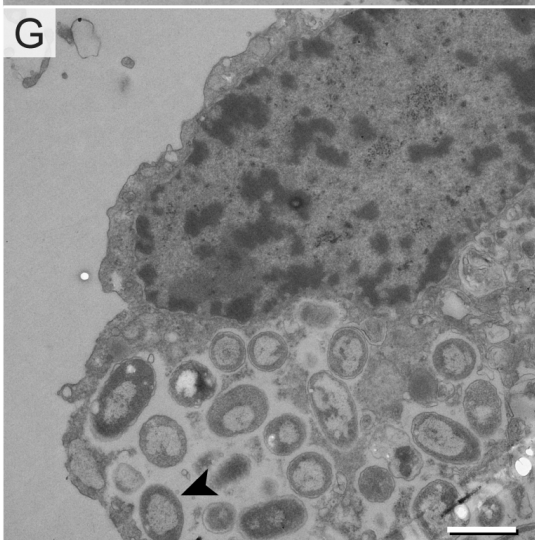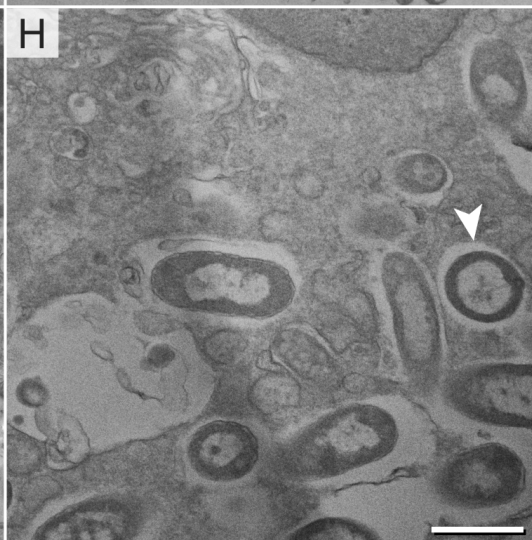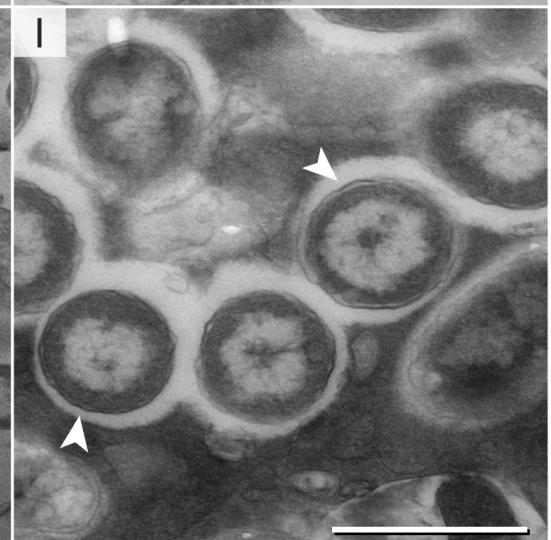

Source: https://www.biorxiv.org/content/biorxiv/early/2020/09/17/2020.09.14.297432.full.pdf
